## OPEN ACCESS

# Knockdown of GSK3 $\beta$ increases basal autophagy and AMPK signalling in nutrient-laden human aortic endothelial cells

Karen A. Weikel\*<sup>1</sup>, José M. Cacicedo\*, Neil B. Ruderman\* and Yasuo Ido\*

\*Department of Medicine, Boston University School of Medicine and Boston Medical Center, 650 Albany Street, Boston, MA 02118, U.S.A.

## Synopsis

High concentrations of glucose and palmitate increase endothelial cell inflammation and apoptosis, events that often precede atherogenesis. They may do so by decreasing basal autophagy and AMP-activated protein kinase (AMPK) activity, although the mechanisms by which this occurs are not clear. Decreased function of the lysosome, an organelle required for autophagy and AMPK, have been associated with hyperactivity of glycogen synthase kinase 3 $\beta$  (GSK3 $\beta$ ). To determine whether GSK3 $\beta$  affects nutrient-induced changes in autophagy and AMPK activity, we used a primary human aortic endothelial cell (HAEC) model of type 2 diabetes that we had previously characterized with impaired AMPK activity and autophagy [Weikel et al. (2015) *Am. J. Physiol. Cell Physiol.* **308**, C249–C263]. Presently, we found that incubation of HAECs with excess nutrients (25 mM glucose and 0.4 mM palmitate) increased GSK3 $\beta$  activity and impaired lysosome acidification. Suppression of GSK3 $\beta$  in these cells by treatment with a chemical inhibitor or overexpression of kinase-dead GSK3 $\beta$  attenuated these lysosomal changes. Under control and excess nutrient conditions, knockdown of GSK3 $\beta$  increased autophagosome formation, forkhead box protein O1 (FOXO1) activity and AMPK signalling and decreased Akt signalling. Similar changes in autophagy, AMPK and Akt signalling were observed in aortas from mice treated with the GSK3 $\beta$  inhibitor CHIR 99021. Thus, increasing basal autophagy and AMPK activity by inhibiting GSK3 $\beta$  may be an effective strategy in the setting of hyperglycaemia and dyslipidaemia for restoring endothelial cell health and reducing atherogenesis.

**Key words:** AMP-activated protein kinase (AMPK), autophagy, endothelium, forkhead box protein O1 (FOXO1), glycogen synthase kinase 3 $\beta$  (GSK3 $\beta$ ).

Cite this article as: *Bioscience Reports* (2016) **36**, e00382, doi:10.1042/BSR20160174

## INTRODUCTION

During hyperglycaemia and dyslipidaemia, dysregulation of macroautophagy [1] (hereafter referred to as ‘autophagy’) and AMP-activated protein kinase (AMPK) [1–3] is associated with endothelial cell damage and dysfunction, events that often precede atherogenesis [4,5]. Despite this, the mechanisms by which high concentrations of glucose and fatty acids such as palmitate alter autophagy and AMPK activity are not well-understood.

Autophagy is a process by which a cell digests long-lived proteins and organelles to either synthesize new ones or generate fuel. These proteins and/or organelles are recruited to a double-membrane vesicle called an autophagosome. The autophagosome

then fuses with the lysosome to create an autolysosome, where its cargo can be degraded by proteases. Autophagy can be induced by conditions such as starvation or inflammation, but also occurs constitutively under non-starvation conditions in what is referred to as basal autophagy [6], a process critical for the maintenance of cellular homeostasis in the vasculature. Compared with wild-type mice, basal autophagy is impaired in the aorta of ApoE-null mice [7], a model of atherosclerosis, and its impairment in macrophages is associated with increased plaque development [7–9]. Additional evidence illustrating the important role of autophagy in vascular health can be found in studies using high-fat fed rabbits, in which activation of macrophage autophagy through the use of mammalian target of rapamycin complex 1 (mTORC1) inhibitors has been shown to slow progression of

**Abbreviations:** ACC, acetyl-CoA carboxylase; AMPK, AMP-activated protein kinase; FOXO1, forkhead box protein O1; GSK3 $\beta$ , glycogen synthase kinase 3 $\beta$ ; HAEC, human aortic endothelial cell; HUVEC, human umbilical vein endothelial cell; LC3, microtubule-associated protein light chain 3; MEF, mouse embryonic fibroblast; mTORC1, mammalian target of rapamycin complex 1; PP2A, protein phosphatase 2A; TFEB, transcription factor EB.

<sup>1</sup> To whom correspondence should be addressed (email [kaweikel@bu.edu](mailto:kaweikel@bu.edu)).

atherosclerosis and stabilize plaques [10–12]. Autophagic and lysosomal dysregulation has also been observed in human umbilical vein endothelial cells (HUVECs) treated with oxidized LDL [13], a contributor to plaque development. In a human aortic endothelial cell (HAEC) culture model that we developed to mimic the diabetic milieu during early atherogenesis, we observed impairment of autophagosome formation and lysosome enzyme activity [1]. In this model, chronic incubation of the cells in media containing 25 mM glucose, followed by an acute exposure to 0.4 mM palmitate, elicited several pro-atherogenic events in addition to impaired basal autophagy including inflammation, apoptosis and reduced activity of AMPK [1]. Activation of AMPK [14] and restoration of basal autophagy with rapamycin [1] attenuated the effects of excess nutrients on inflammation and apoptosis. Interestingly, activation of AMPK, an autophagy inducer under low-nutrient conditions [15–17], did not induce autophagy in HAECs in the presence of excess nutrients [1]. To gain insight into potential therapeutic targets for restoring autophagy under excess nutrient conditions, we carried out studies to elucidate the mechanism(s) by which high concentrations of glucose and palmitate impair basal autophagy in HAECs.

A focus of these studies was glycogen synthase kinase 3 $\beta$  (GSK3 $\beta$ ), an enzyme whose activity is increased in both humans and experimental animals with diabetes [18–20]. GSK3 $\beta$  has been shown to phosphorylate AMPK at Thr<sup>479</sup> thus inhibiting its activity in HEK293 cells, mouse embryonic fibroblasts (MEFs), neutrophils and macrophages [21,22]. It can also inhibit autophagy by several possible mechanisms including diminution of lysosome acidification (as suggested by studies in SHSY-5Y [23] and MCF-7 cells [24]), decreased nuclear translocation of transcription factor EB (TFEB), a transcription factor for autophagy and lysosomal genes (as suggested by studies in HEK293 and human pancreatic cancer cells) [25], and perhaps under certain conditions by suppressing the activity of AMPK [21,22,26] or activating mTORC1 [24]. If and how GSK3 $\beta$  affects basal autophagy in HAECs exposed to excess nutrients has not been studied.

For all of the above reasons, we first evaluated whether the diabetic milieu alters GSK3 $\beta$  activity in HAECs. We then investigated how inhibition of GSK3 $\beta$  activity affected lysosome acidification and autophagosome formation in HAECs exposed to excess nutrients. Finally, we assessed changes in autophagy- and AMPK-related signalling in nutrient-laden HAECs subjected to GSK3 $\beta$  inhibition and in aortas of mice treated with the GSK3 $\beta$  inhibitor, CHIR 99021.

## MATERIALS AND METHODS

### Materials

HAECs (catalogue # cc-2535) and EGM-2 media (catalogue # cc-3162) were purchased from Lonza. Bafilomycin (catalogue # B1793), DMSO (catalogue # D2438) and Akt 1/2 kinase inhibitor (Akt inhibitor VIII or Akti) (catalogue # A6730) were purchased

from Sigma, CHIR 99021 from Tocris Bioscience and palmitate from Nu-Chek Prep. Antibodies raised against LC3-II (catalogue # 3868S), phosphorylated (Thr<sup>172</sup>) AMPK( $\alpha$ 1/ $\alpha$ 2) (catalogue # 2531S), phosphorylated (Ser<sup>485</sup>) AMPK  $\alpha$ 1 (catalogue # 4185), phosphorylated (Ser<sup>79</sup>) ACC (catalogue # 3661S), phosphorylated (Ser<sup>2448</sup>) mTOR (catalogue # 2971S), total mTOR (catalogue # 2972S), phosphorylated (Ser<sup>9</sup>) GSK3 $\beta$  (catalogue # 5558), total GSK3 $\beta$  (catalogue # 12456), phosphorylated (Ser<sup>641</sup>) glycogen synthase (catalogue # 3891), phosphorylated (Ser<sup>473</sup>) Akt1 (catalogue # 9018P), total Akt (catalogue # 9272), phosphorylated (Thr<sup>24</sup>) FOXO1 (catalogue # 2599S) and LAMP1 (catalogue # 9091P) were purchased from Cell Signaling Technology. Antibody raised against phosphorylated (Thr<sup>308</sup>) Akt was purchased from Upstate Biotechnologies (now Millipore). Antibody raised against total AMPK $\alpha$ 1 (catalogue # 3694-1) was purchased from Epitomics and against  $\beta$ -actin (catalogue # A4700) from Sigma. Antibody raised against Hsp90 $\alpha$ / $\beta$  (catalogue # sc-7947) and GAPDH (catalogue # sc-25778) from Santa Cruz Biotechnology. Secondary peroxidase conjugated anti-rabbit (catalogue # NA934V) antibody was obtained from GE Healthcare.

### Cell culture

HAECs were grown in EGM-2 media containing 2% FBS on Primaria culture dishes (reference no. 353803) (BD Biosciences). Excess nutrient conditions were implemented as described previously [1]. For hyperglycaemic conditions, cells were grown and passaged in EGM-2 media supplemented with D-glucose (catalogue # G-7021) (Sigma) to a final concentration of 25 mM. The cells were then incubated in hyperglycaemic media beginning in passage 3 and when they reached 85% confluence, were split in hyperglycaemic media for passage 4. This protocol for maintaining and splitting the cells in hyperglycaemic media was repeated for future passages. For both normoglycaemic and hyperglycaemic cells, experiments began in passage 5 and were performed when cells were 85–95% confluent. At this time, media was changed to DMEM (Life Technologies) (catalogue # 31600-034) supplemented with 5% FBS containing either BSA or BSA-palmitate conjugates, as described previously [1,27]. Briefly, BSA was used both to stabilize the insoluble fatty acids and to transport them to the cell. Control-treated cells were exposed to media containing 0.5 mM BSA, and fatty acid-treated cells to media containing BSA conjugated to 0.4 mM palmitate at a 3:1 FFA:BSA molar ratio. Cells were exposed to BSA or BSA-palmitate conjugates in DMEM for 6 h prior to harvesting for analysis. For experiments that included bafilomycin or Akt inhibitor VIII (Akti), they were added to the cells 30 min prior to DMEM incubation which took place over the next 6 h. For experiments using CHIR 99021, it was added to the cells 17 h prior to DMEM incubation which took place over the next 6 h.

### Recombinant lentivirus preparation

The recombinant lentivirus plasmid expressing small-hairpin RNA targeting GSK3 $\beta$  (ggcacgtttggaagaat) was created as published previously [28]. The recombinant lentivirus plasmid

expressing the kinase-dead GSK3 $\beta$  mutant (K85A GSK3 $\beta$ ) was created as follows. The coding sequence of human GSK3 $\beta$  (BC000251, from ATCC) was subcloned into a pENTR1A vector (Invitrogen) and site-specific mutation was introduced by PCR using mutation primers (forward TCAGGAGAACTGGTCGCCATCGCGAAAGTATTGCAGGACAAGAGA, reverse TCTCTTGTCTGCAATACTTTCGCGATGGCGACAGTTCTCCTGA). After confirming the mutation by sequence analysis, the mutated coding sequence was transferred by LR reaction (Invitrogen) to a home-made lentivirus vector in which the CMV promoter expresses the targeting sequence. The recombinant lentivirus plasmid expressing GFP-LC3 (Addgene #22418) was created in a home-made Gateway compatible lentivector after subcloning it into a pENTR1A vector and lentivirus produced as described previously [28].

### Western blotting

Cells were harvested and lysed in a Triton-based buffer containing 20 mM Tris pH 7.5, 150 mM NaCl, 1 mM EDTA, 1 mM EGTA, 0.1 % SDS, 1 % Triton X-100, 2.5 mM sodium pyrophosphate, 1 mM  $\beta$ -glycerophosphate, 1 mM sodium orthovanadate and 1  $\mu$ g/ml leupeptin. Following brief sonication, lysates were centrifuged at 16,300 g for 10 min at 4 °C. The supernatants were stored at -80 °C for future analysis. Proteins were separated using either 4–12 % Bis-tris gradient or 14 % Tris-glycine gels (Life Technologies) and transferred to PVDF membranes. After blocking for at least 1 h at room temperature with non-fat milk, membranes were incubated in primary antibody overnight. Following washing in TBST, membranes were incubated in peroxidase conjugated anti-rabbit antibody and bands were visualized on film using SuperSignalWest Pico (catalogue # 1856135 and 1856136) or Femto (catalogue # 34095) chemiluminescent substrate (Thermo Scientific). Densitometric analyses were carried out using Scion Image software and presented after adjusting for loading controls, GAPDH and  $\beta$ -actin, as used previously [1]. We observed similar results between those analyses based upon GAPDH and those based upon  $\beta$ -actin.

### Lysosome acidification

HAECs were treated with LysoTracker Red DND-99 (Life Technologies) (catalogue # L-7528) according to the manufacturer's instructions. Briefly, following incubation in control or excess nutrient conditions, cells were incubated with lysotracker dye for 30 min. Cells were then washed and fluorescence was visualized on a Nikon TE-200 Eclipse Inverted microscope. After capturing images they were quantified with ImageJ (NIH). For each image, fluorescence levels were adjusted for the number of cells present.

### LAMP1 immunohistochemistry

HAECs were exposed to either control or excess nutrient conditions as described above and fixed in 0.4 % formalin. Antigen retrieval was performed using citrate buffer. In conjunction with

anti-LAMP1 antibody (Cell Signaling Technologies) Ultratech HRP 500–600 tests (catalogue # IM2391, Beckman-Coulter) and ImmPACT AMEC Red Peroxidase HRP substrate (catalogue # SK-4285, Vector Laboratories) were used to visualize LAMP1. ImageJ (NIH) was used to quantify LAMP1 staining relative to the number of cells in each image.

### Assessment of autophagosome formation

Cells were exposed to experimental conditions as described above for 6 h, in the presence or absence of 10 nM bafilomycin. Bafilomycin-induced LC3-II protein levels, or the ratio of LC3-II/LC3-I protein, as measured by western blotting, were used as indicators of autophagosome formation. To measure LC3-II protein accumulation by fluorescence microscopy, HAECs were infected with GFP-LC3 expressing lentivirus. Three days following infection, distinct perinuclear puncta are indicative of LC3-II. Following experimental treatment, puncta fluorescence was visualized on a Nikon TE-200 Eclipse Inverted microscope and quantified with ImageJ (NIH). For each well, the percentage of GFP-LC3 infected cells that expressed distinct perinuclear puncta was multiplied by the average GFP fluorescence per cell to calculate the GFP-LC3 puncta measurement. This score was averaged across all wells of the treatment group.

### Real-time PCR

SYBR green Master Mix from Clontech Laboratories (catalogue #RR420A) was used to quantify real-time PCR product on Cepheid's Smart Cycler. The following primers were used to detect mRNAs:  $\beta$ -actin: 5'-TTGTAACCAACTGGGACGATATGG-3' (sense) and 5'-GATCTTGATCTTCATGGTGCTAGG-3' (antisense), PIK3C3: 5'-GCCACCAGTACAAAACATGGCT-3' (sense) and 5'-TGGCCATTCTCACTTGGTGC-3' (antisense) and SOD2: 5'-TGTCCAAATCAGGATCCACTGC-3' (sense) and 5'-GGCCTGACATTTTATACCTGAAGGT-3' (antisense). mRNA levels of PIK3C3 and SOD2 were quantified using the  $2(-\Delta\Delta C(T))$  method, relative to actin.

### Animal experiments

Sixteen male C57BL6/J background mice between 17 and 24 weeks of age were housed under controlled temperature (22 °C), humidity (40 %) and light (12 h:12 h light/dark cycle) conditions in a specific pathogen-free vivarium and provided food and water *ad libitum*. All experimental procedures were approved by the Institutional Animal Care and Use Committee. For 3 consecutive days, mice were injected intraperitoneally with either 7.5 mg/kg per day CHIR 99021 (45 % saline, 45 % PEG400, 10 % DMSO) or saline/PEG400. Following the injection on the third day, the mice were anaesthetized with inhaled isoflurane (catalogue # 050033, Henry Schein, Dublin, OH) and killed by cervical dislocation. The thoracic aorta was harvested and periaortic fat removed with the use of a dissecting microscope, on ice. The aortas were snap-frozen in liquid nitrogen and stored

at  $-80^{\circ}\text{C}$ . For western blot analysis, aortas were homogenized in a tissue grinder (Kimble Chase) in a Triton-based buffer containing 20 mM Tris pH 7.5, 150 mM NaCl, 1 mM EDTA, 1 mM EGTA, 0.1% SDS, 1% Triton X-100, 2.5 mM sodium pyrophosphate, 1 mM  $\beta$ -glycerophosphate, 1 mM sodium orthovanadate and 1  $\mu\text{g}/\text{ml}$  leupeptin. Following brief sonication, lysates were centrifuged at 16,300  $g$  for 10 min at  $4^{\circ}\text{C}$ . The supernatants were stored at  $-80^{\circ}\text{C}$  for future analysis. Protein levels were analysed in these samples by western blot. During these analyses, GAPDH was overexposed so we utilized a loading control located in a different region of the membrane, Hsp90 [29].

## Statistics

Data are presented as means  $\pm$  S.E.M. Unless stated otherwise, differences between treatment groups were analysed using ANOVA (GraphPad software).  $P < 0.05$  was considered significant. Sample sizes ( $n$ ) are indicated in each figure legend and refer to separate cell culture wells (biological replicates) or animals. All experiments were performed independently at least twice with similar results.

## RESULTS

### High concentrations of glucose and palmitate increase GSK3 $\beta$ activity in HAECs

Increased GSK3 $\beta$  activity has been observed in skeletal muscle of humans with diabetes [18] and in epididymal adipose tissue [19] and hearts [20] of diabetic mice. To determine if GSK3 $\beta$  activity is elevated in our HAEC model of poorly-controlled type 2 diabetes, we first exposed HAECs to excess nutrient conditions (cells were passaged at least twice in media containing 25 mM glucose and then exposed to 0.4 mM palmitate for 6 h) and measured protein levels of phosphorylated GSK3 $\beta$ . Unlike most enzymes, GSK3 $\beta$  is constitutively active and is inhibited when phosphorylated at Ser<sup>9</sup> [30]. Compared with control conditions (5 mM glucose, 0 mM palmitate), excess nutrient conditions decreased the ratio of phosphorylated GSK3 $\beta$  (p-GSK3 $\beta$ <sup>Ser9</sup>)/total GSK3 $\beta$  (t-GSK3 $\beta$ ), indicating that GSK3 $\beta$  activity increased (Figure 1A). Glycogen synthase (GS) is a downstream target of GSK3 $\beta$  that is inactivated when phosphorylated at Ser<sup>641</sup> by GSK3 $\beta$ . Consistent with the changes we observed in p-GSK3 $\beta$ <sup>Ser9</sup>/t-GSK3 $\beta$ , we found that excess nutrients also increased protein levels of phosphorylated GS (p-GS<sup>Ser641</sup>) (Figure 1A).

### Excess nutrients decrease lysosome acidification

High GSK3 $\beta$  activity has been reported to inhibit autophagy by interfering with lysosome acidification [23,24]. Lysosomes fuse with autophagosomes to form autolysosomes [31] and require a low pH to degrade autophagic substrates using proteases such as cathepsins [32]. Overexpression of GSK3 $\beta$  in MCF-7 cells

[24] and SHSY-5Y cells [23] impairs lysosome acidification and chemical inhibition of GSK3 $\beta$  in HEK293 cells increases lysosome acidification [25]. Since excess nutrients increased GSK3 $\beta$  activity in our model (Figure 1A), decreased lysosome acidification could contribute to the decrease in cathepsin L activity and overall impairment of autophagic flux that we reported previously [1]. We measured the effect of excess nutrients on lysosome acidification using lysotracker red dye, which stains acidic organelles such as lysosomes and autolysosomes [33]. Indeed, excess nutrients decreased lysotracker staining (Figure 1B), suggesting that fewer of these acidic vesicles were present. To determine if this loss of lysotracker staining was due to decreased acidification or a decrease in the number of these vesicles, we used immunohistochemistry to evaluate protein expression of LAMP1, a protein that resides on the lysosomal membrane. As shown in Figure 1(C), excess nutrients did not decrease LAMP1 protein expression, indicating that excess nutrients did not decrease the number of lysosomes in HAECs, but decreased their acidification.

### Inhibition of GSK3 $\beta$ activity attenuates excess nutrient-induced suppression of lysosome acidification

Thus far, we have shown that excess nutrients increase GSK3 $\beta$  activity and decrease lysosome acidification in HAECs (Figure 1). To determine the role of GSK3 $\beta$  activity in lysosome acidification, we decreased GSK3 $\beta$  activity in HAECs by infecting them with a lentivirus expressing small-hairpin RNA targeting GSK3 $\beta$  (shGSK3 $\beta$ ) (Supplementary Figure S1A). We found that under both control and excess nutrient conditions, compared with cells infected with a control lentivirus (shc), cells infected with shGSK3 $\beta$  had more lysotracker staining (Supplementary Figure S1B). We also decreased GSK3 $\beta$  activity in HAECs by infecting them with a lentivirus expressing a kinase-dead mutant of GSK3 $\beta$ , K85A GSK3 $\beta$  (Supplementary Figure S2A). Compared with shc-infected cells, there was no change in lysotracker staining in K85A GSK3 $\beta$ -infected cells under control conditions and a small decrease in lysotracker staining under excess nutrient conditions (Supplementary Figure S2B). This decrease in excess nutrient conditions was smaller than that of non-infected cells, as shown in Figure 1(B). Although the shGSK3 $\beta$  and K85A GSK3 $\beta$  lentiviruses did not have the same effect on lysotracker staining in excess nutrient-exposed HAECs, both showed more lysotracker staining than cells with full GSK3 $\beta$  activity in this condition. To further evaluate the effect of GSK3 $\beta$  inhibition on lysosome acidification, we treated cells with CHIR 99021 [34], an ATP-competitive inhibitor, and measured excess nutrient-induced changes in lysotracker staining. Using a dose which inhibits GSK3 $\beta$  in excess nutrient conditions (Supplementary Figure S3), we found that CHIR 99021 treatment attenuated the effect of excess nutrients on lysotracker staining (Figure 2A). CHIR 99021 did not affect LAMP1 protein levels (Figure 2B), indicating that its increase in lysotracker staining was due to increased acidification rather than lysosome number.

To gain some insight regarding the effects of GSK3 $\beta$  hyperactivation on lysosome acidification, we increased GSK3 $\beta$

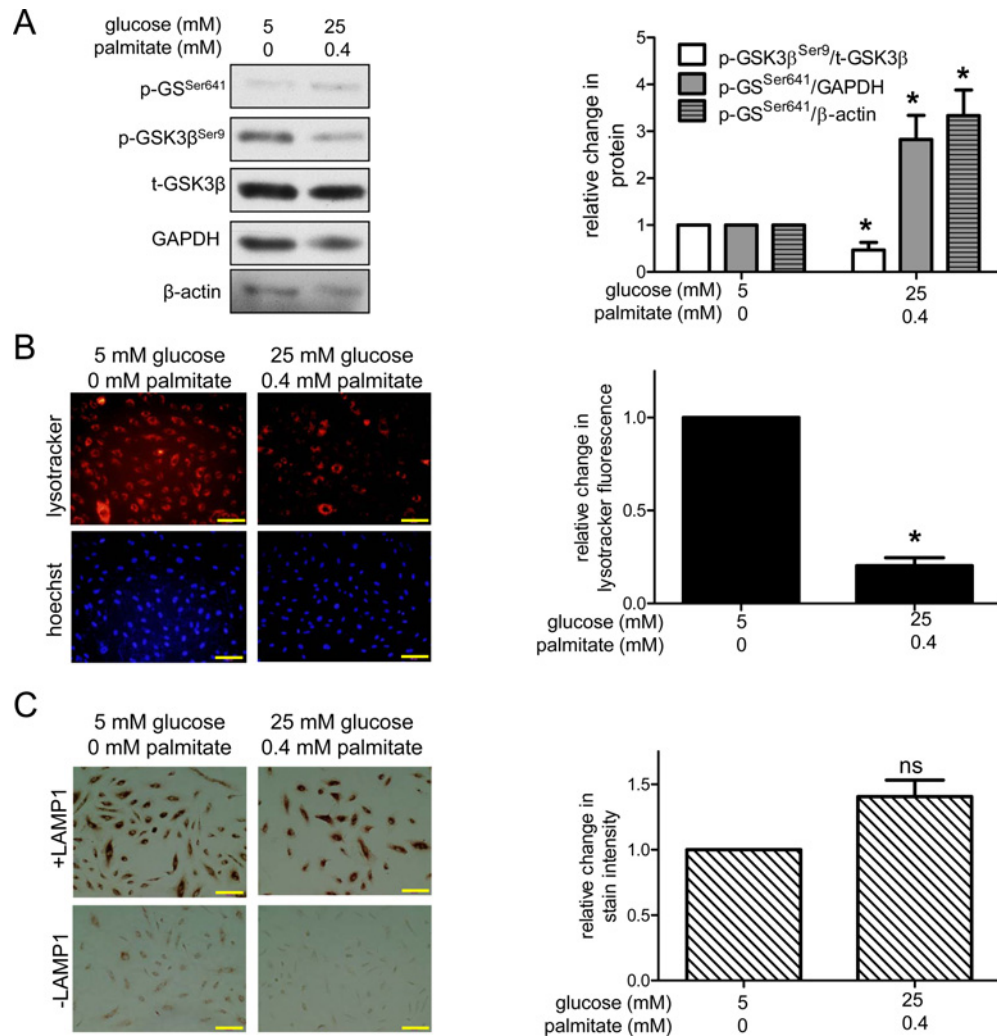

**Figure 1** Excess nutrients increase GSK3 $\beta$  activity and decrease lysosome acidification

(A) HAECs incubated in excess nutrient conditions have a decreased ratio of inhibitory p-GSK3<sup>Ser9</sup>/t-GSK3 $\beta$  protein and increased protein levels of p-GS<sup>Ser641</sup>, a downstream target of GSK3 $\beta$  (GAPDH  $n = 4$ ;  $\beta$ -actin  $n = 3$ ). (B) Exposure to excess nutrients decreased lysotracker staining ( $n = 7$ ). (C) Excess nutrients did not decrease LAMP1 protein levels ( $n = 5$ ). \* indicates  $P < 0.05$  by Student's  $t$  test compared with control conditions. For (B) and (C), bar = 100  $\mu$ m.

activity by treating HAECs with Akt 1/2 kinase inhibitor VIII (Akti). Since Akt is an upstream kinase that inhibits GSK3 $\beta$ , Akti treatment increased GSK3 $\beta$  activity, as indicated by a decreased ratio of p-GSK3<sup>Ser9</sup>/t-GSK3 $\beta$  (Supplementary Figure S4A). Under both control (Supplementary Figure S4B) and excess nutrient conditions (Supplementary Figure S4C), Akti treatment decreased lysotracker staining, indicating that similar to MCF-7 cells [24] and SHSY-5Y cells [23], increased GSK3 $\beta$  activity in HAECs can decrease lysosome acidification. Besides activating GSK3 $\beta$ , Akt inhibition could decrease lysotracker staining by inhibiting mTORC1 and thus decreasing nuclear localization of TFEB, a regulator of lysosome biogenesis [35]. However, since excess nutrients did not alter LAMP1 expression (Figure 1C), it is unlikely that the excess nutrient-induced hyperactivation of

GSK3 $\beta$  activity that we are studying affects lysosome biogenesis and TFEB.

Collectively, these data suggest that in HAECs, activation of GSK3 $\beta$  may be involved in excess nutrient-induced decreases in lysosome acidification.

### Inhibition of GSK3 $\beta$ activity increases autophagosome formation in HAECs under control and excess nutrients conditions

In addition to an acidic lysosome, efficient autophagic flux requires adequate autophagosome formation [6]. Autophagosomes can be quantified indirectly by measuring the protein levels of microtubule-associated protein light chain 3 (LC3), a

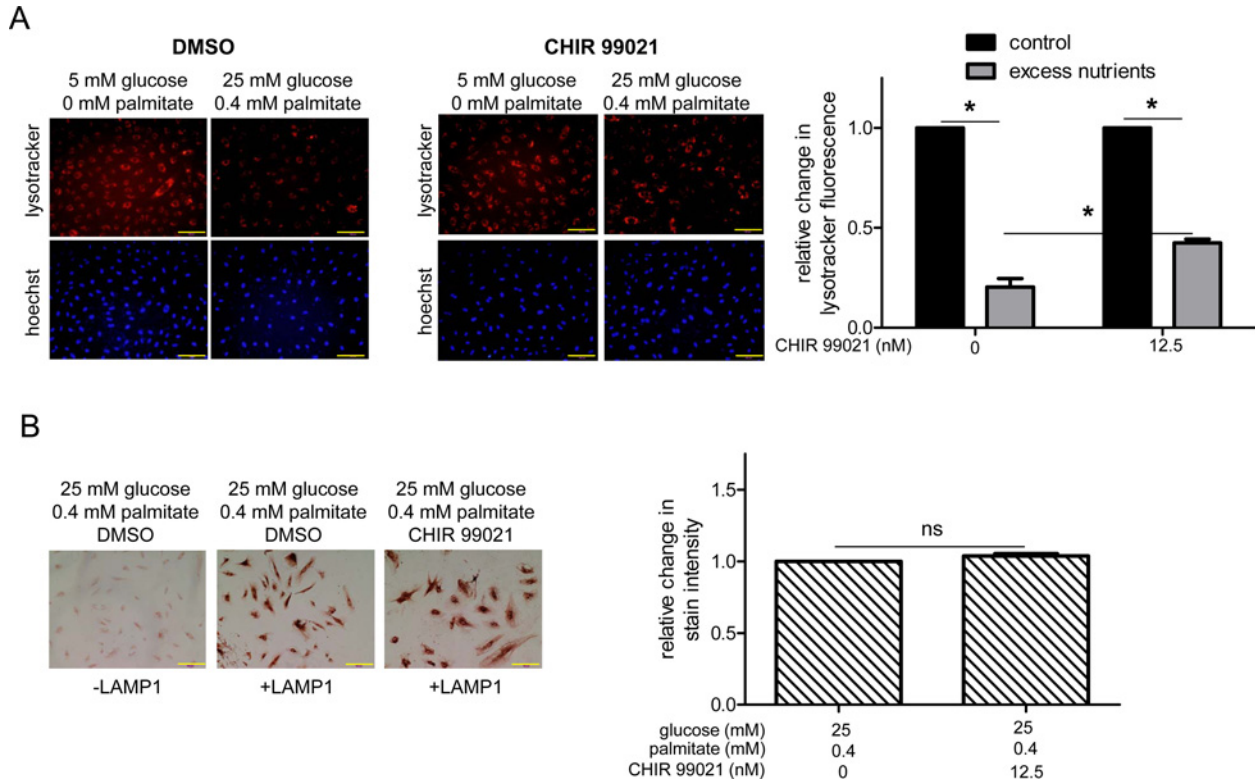

**Figure 2** Reduction of GSK3 $\beta$  activity with CHIR 99021 attenuates the effects of excess nutrients on lysosome acidification

(A) Compared with excess nutrient-exposed HAECs treated with vehicle alone (DMSO), those incubated with 12.5 nM CHIR 99021 for 23 h had more lysotracker staining. Representative images are shown adjacent to graph. \* indicates  $P < 0.05$  by Student's  $t$  test ( $n = 3$ ). (B) CHIR 99021 treatment did not affect LAMP1 staining in cells incubated in excess nutrient conditions. ns indicates no significant difference ( $n = 3$ ). Quantification of fluorescence or LAMP1 is relative to the number of cells in each image. Bar = 100  $\mu\text{m}$ .

membrane-bound component of the autophagosomal membrane [36]. LC3 is present in the cytosol as LC3-I, but upon conjugation with phosphatidylethanolamine it is incorporated into the developing autophosome membrane as LC3-II. Protein levels of LC3-II, or the LC3-II/LC3-I ratio are surrogate indicators of autophagosome abundance and formation. LC3-II levels can be assessed by infecting cells with a virus expressing GFP-LC3 and monitoring fluorescence of discrete puncta. They can also be evaluated by western blot, as can the ratio of LC3-II/LC3-I. Since LC3-II is degraded by the lysosome, we performed these measurements in the presence of the lysosomal inhibitor bafilomycin A1 (hereafter referred to as simply bafilomycin) to prevent LC3-II degradation [37,38]. Thus, treatment with bafilomycin causes an accumulation of LC3-II protein. A decrease in bafilomycin-induced LC3-II protein accumulation would suggest that autophagosome formation is diminished.

Previously, we showed that excess nutrients impair autophagosome formation [1]. To explore whether GSK3 $\beta$  might play a role in this phenomenon, we treated excess nutrient-exposed HAECs with CHIR 99021 and measured LC3 protein levels. Under excess nutrient conditions, inhibition of GSK3 $\beta$  with CHIR

99021 increased the ratio of LC3-II/LC3-I and LC3-II protein levels relative to GAPDH (Figure 3). In the presence of CHIR 99021, bafilomycin-induced changes in LC3-II protein levels relative to  $\beta$ -actin showed a similar trend, but did not reach statistical significance. Thus, to verify the effect of GSK3 $\beta$  inhibition on autophagosome formation under excess nutrient conditions and extend our findings to control conditions, we used additional methods to both inhibit GSK3 $\beta$  activity and evaluate LC3 protein expression. We found that under both control and excess nutrient conditions, compared with cells infected with a control lentivirus (shc), cells infected with shGSK3 $\beta$  accumulated more LC3-II protein in the presence of bafilomycin, as measured by both GFP-LC3 puncta (Figure 4A) and western blot (Supplementary Figure S5A). We also measured LC3-II protein levels in HAECs infected with the kinase-dead mutant K85A GSK3 $\beta$ . Compared with cells with full GSK3 $\beta$  activity, K85A GSK3 $\beta$ -infected cells accumulated more LC3-II protein when treated with bafilomycin (Figure 4B, Supplementary Figure S5B). These data suggest that inhibition of GSK3 $\beta$  activity can increase autophagosome formation under both control and excess nutrient conditions.

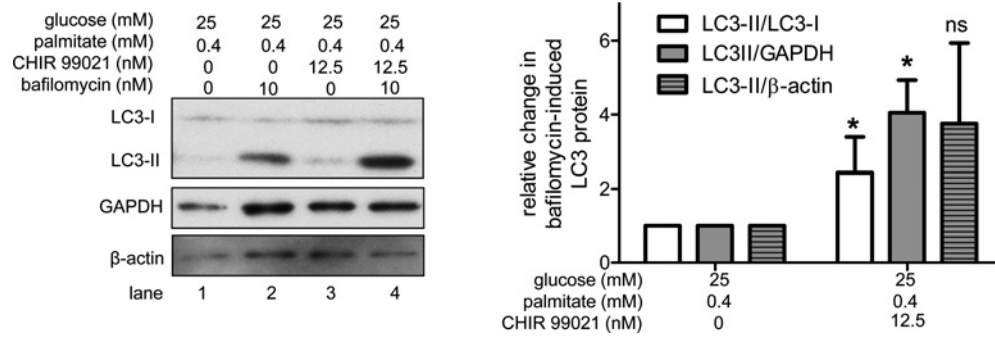

**Figure 3** CHIR 99021 treatment increases bafilomycin-induced protein levels of the autophagosome marker LC3-II in excess nutrient conditions

Treatment of excess nutrient-exposed HAECs with 12.5 nM CHIR 99021 for 23 h increased the ratio of LC3-II/GAPDH and the ratio of LC3-II/LC3-I as determined by western blot. For example, LC3-II/GAPDH in [lane 4-lane 3] > [lane 2-lane 1]. \* indicates  $P < 0.05$  for an effect of CHIR 99021 under excess nutrient conditions by two-way ANOVA ( $n = 6$ ).

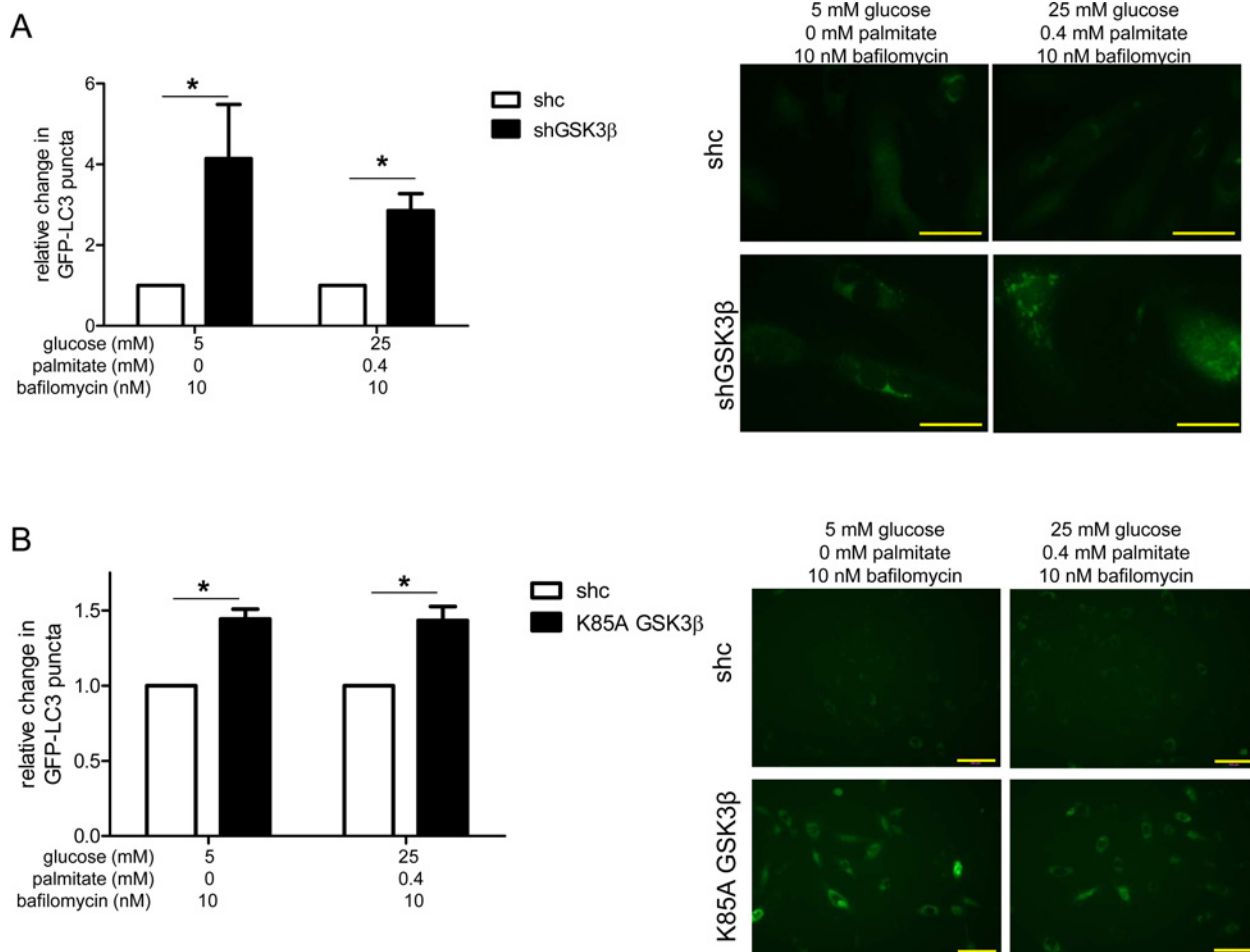

**Figure 4** Reduction of GSK3 $\beta$  activity increases protein levels of LC3-II

Compared with HAECs-infected with control lentivirus (shc), those infected with lentivirus reducing expression of GSK3 $\beta$  (shGSK3 $\beta$ ) (A) or expressing kinase-dead GSK3 $\beta$  (K85A GSK3 $\beta$ ) (B) had more GFP-LC3 puncta under both control and excess nutrient conditions. Punctate structures, rather than diffuse GFP staining is indicative of LC3-II expression. Quantification is shown relative to shc for each treatment condition, adjacent to representative images. Bar = 50  $\mu$ m in A and 100  $\mu$ m in B. \* indicates  $P < 0.05$  for an effect of lentivirus infection by two-way ANOVA (A:  $n = 3$ ; B:  $n = 5$ ).

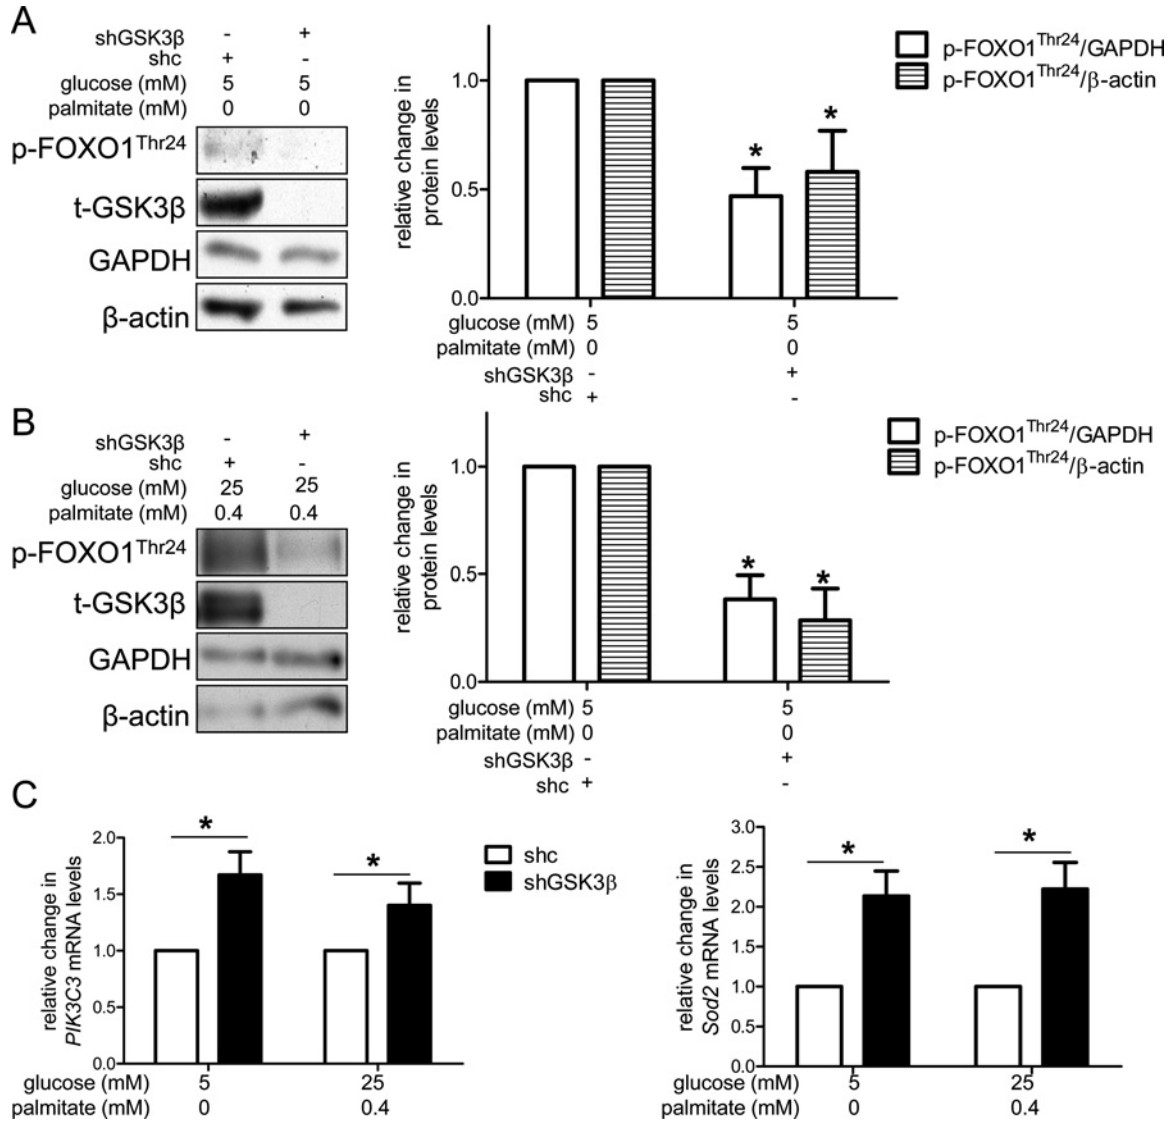

**Figure 5 Knockdown of GSK3β protein increases FOXO1 activity**

(A) Compared with HAECs infected with control lentivirus (shc), those infected with lentivirus reducing expression of GSK3β (shGSK3β) had less p-FOXO1<sup>Thr24</sup> under both control (A) and excess nutrient conditions (B). Representative western blots are shown adjacent to the graphs. (C) Knockdown of GSK3β (shGSK3β) increased mRNA levels of PIK3C3 (left) and SOD2 (right) compared with controls (shc). \* indicates  $P < 0.05$  for an effect of GSK3β knockdown by two-way ANOVA (For A and B: GAPDH  $n = 6$ ; β-actin  $n = 5$ ).

### Knockdown of GSK3β increases Akt/AMPK-FOXO1 signalling under control and excess nutrient conditions

To begin to address the molecular mechanism by which reduction of GSK3β activity could increase autophagosome formation, we assessed the downstream signalling changes induced by knockdown of GSK3β that could influence autophagy. mTORC1 is an established inhibitor of autophagy, and in particular, autophagosome formation [39]. Although inhibition of GSK3β increases autophagic flux by suppressing mTORC1 activity in MCF-7 cells [24], we (Supplementary Figure S6) and others [40–

42] did not observe decreased mTORC1 activity in shGSK3β-infected HAECs, a discrepancy possibly due to cell type variability. Another potential modulator of autophagy is forkhead box protein O1 (FOXO1). FOXO1 has been shown to promote autophagosome formation through its transcriptional targets [43] as well as its acetylation and interaction with Atg7 [44], a protein required for autophagy. We found that knockdown of GSK3β (shGSK3β) reduced the phosphorylation of FOXO1 at Thr<sup>24</sup> (p-FOXO1<sup>Thr24</sup>) under both control (Figure 5A) and excess nutrient conditions (Figure 5B). Reduced phosphorylation of FOXO1 at Thr<sup>24</sup> has been associated with its nuclear translocation and



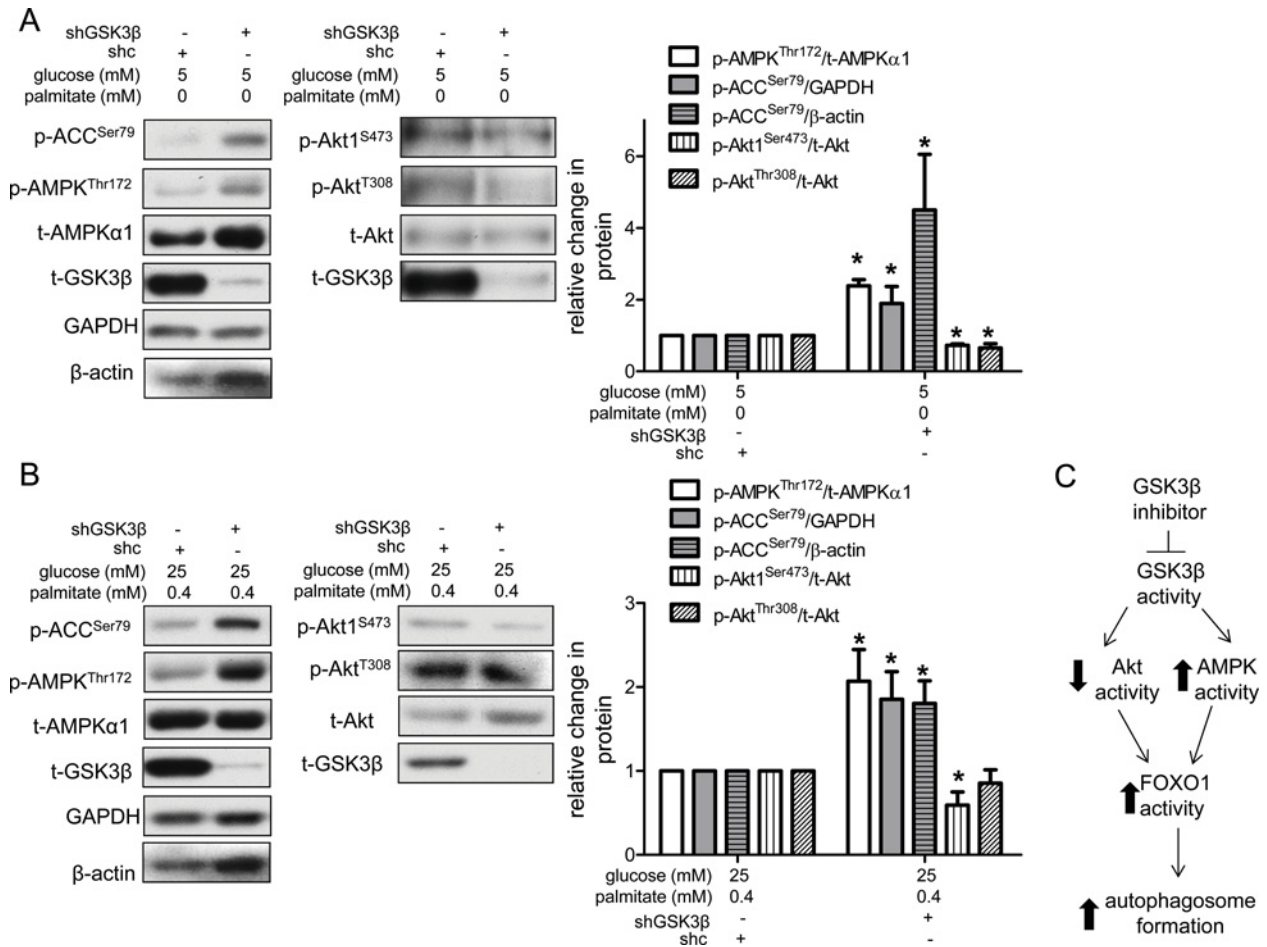

**Figure 6** GSK3 $\beta$  knockdown increases AMPK signalling and decreases Akt signalling

Compared with HAECs infected with control lentivirus (shc), those infected with lentivirus reducing the expression of GSK3 $\beta$  (shGSK3 $\beta$ ) had an increased ratio of p-AMPK<sup>Thr172</sup>/t-AMPK $\alpha$ 1 protein ( $n = 5$ ), increased p-ACC<sup>Ser79</sup> (GAPDH  $n = 5$ ;  $\beta$ -actin  $n = 4$ ), a downstream target of AMPK and a decreased ratio of p-Akt<sup>Ser473</sup>/t-Akt ( $n = 3$ ) under both control (A) and excess nutrient conditions (B). shGSK3 $\beta$  also decreased the ratio of p-Akt<sup>Thr308</sup>/t-Akt ( $n = 5$ ) under control conditions (A). \* indicates  $P < 0.05$  for an effect of GSK3 $\beta$  knockdown by ANOVA. Representative western blots are shown with densitometric analyses. Separate blots are shown for AMPK and Akt signalling due to the similarity in molecular mass of AMPK and Akt. (C) Proposed pathway by which suppression of GSK3 $\beta$  activity could increase autophagosome formation in HAECs exposed to excess nutrients.

activation [45,46]. To verify the activation of FOXO1 in our model, we measured mRNA levels of *PIK3C3* and *Sod2*, gene targets of FOXO1 that also encode for autophagy-associated proteins [47–49]. Indeed, under both control and excess nutrient conditions, knockdown of GSK3 $\beta$  (shGSK3 $\beta$ ) increased mRNA levels of both of these targets (Figure 5C).

FOXO1 is not known to be a direct target of GSK3 $\beta$ , but is targeted by both Akt and AMPK. When phosphorylated by Akt at Thr<sup>24</sup>, Ser<sup>256</sup> or Ser<sup>319</sup>, FOXO1 activity declines [50,51], whereas phosphorylation of FOXO1 at Thr<sup>182</sup>, Thr<sup>649</sup>, Ser<sup>544</sup>, Ser<sup>579</sup> or Ser<sup>616</sup> by AMPK promotes its transcriptional activation [51–53]. Consistent with the reduction of p-FOXO1<sup>Thr24</sup> protein and increase in FOXO1 target gene expression in shGSK3 $\beta$ -infected cells (Figure 5), we found that under control conditions knockdown of GSK3 $\beta$  also decreased the ratios of phosphorylated Akt

(p-Akt<sup>Ser473</sup>)/total Akt (t-Akt) and p-Akt<sup>Thr308</sup>/t-Akt, suggesting that Akt activity was decreased (Figure 6A). We also observed increased AMPK signalling. Phosphorylation of AMPK at Thr<sup>172</sup> (p-AMPK<sup>Thr172</sup>) has been shown to increase the activity of AMPK nearly 100-fold and is often used as a surrogate marker for AMPK activity [54]. We found that compared with HAECs infected with a control lentivirus (shc), cells infected with shGSK3 $\beta$  had a higher ratio of p-AMPK<sup>Thr172</sup>/total AMPK $\alpha$ 1 (t-AMPK $\alpha$ 1) (Figure 6A). Acetyl-CoA carboxylase (ACC) is a substrate of AMPK that plays a role in fatty acid synthesis [55]. Consistent with the increased phosphorylation of AMPK, knockdown of GSK3 $\beta$  also increased phosphorylation of ACC at Ser<sup>79</sup> (p-ACC<sup>Ser79</sup>) (Figure 6A). Similar effects of shGSK3 $\beta$  on Akt and AMPK signalling were observed under excess nutrient conditions (Figure 6B), although the decrease in p-Akt<sup>Thr308</sup>/t-Akt did not

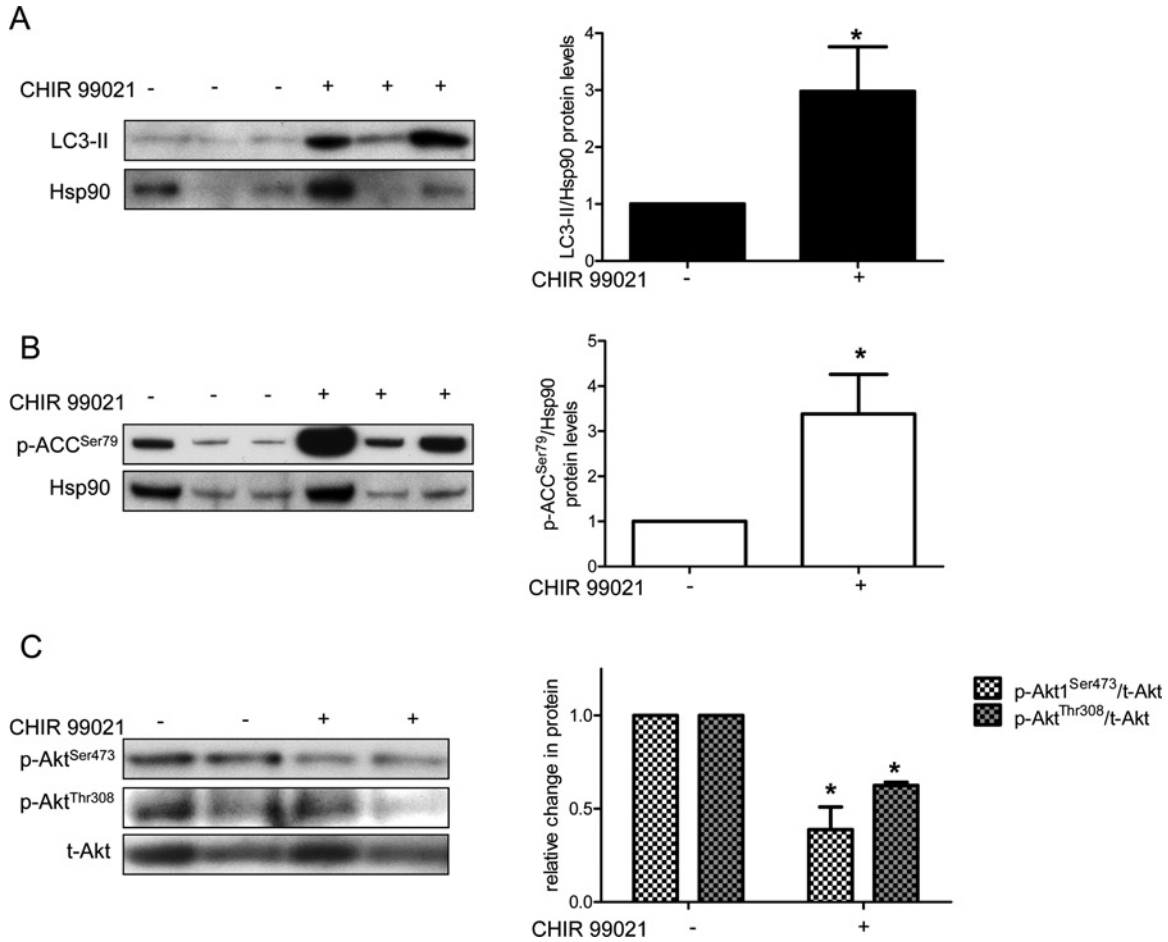

**Figure 7** CHIR 99021 increases LC3-II protein levels and AMPK signalling and decreases Akt signalling in the mouse aorta

Compared with aortas from control-treated mice (injected with saline/PEG400), aortas from mice treated with CHIR 99021 had higher levels of LC3-II protein (A), a marker of autophagosomes and p-ACC<sup>Ser79</sup> (B), a downstream target of AMPK. CHIR 99021-treated aortas also had decreased ratios of p-Akt<sup>Ser473</sup>/t-Akt and p-Akt<sup>Thr308</sup>/t-Akt (C). For (A) and (B), the same eight samples were run on two different gels to optimize visualization of each protein band. Densitometry is shown adjacent to each blot. \* indicates  $P < 0.05$  ( $n = 8$ ).

reach statistical significance. Since phosphorylation of Akt at these two sites is thought to occur via two separate kinases [56], our data suggest that PDK1, which phosphorylates Akt at Thr<sup>308</sup>, may be less sensitive to changes in GSK3 $\beta$  activity under excess nutrient conditions. Nonetheless, the effects of shGSK3 $\beta$  on p-AMPK<sup>Thr172</sup> and p-ACC<sup>Ser79</sup> are consistent with increased FOXO1 transcriptional activity (Figure 5C). Collectively, these data suggest that knockdown of GSK3 $\beta$  may decrease Akt activity (at least under basal conditions) to release its phosphorylation and inhibition of FOXO1. GSK3 $\beta$  knockdown may also increase AMPK activity, facilitating phosphorylation and activation of FOXO1 by AMPK. Such an increase in FOXO1 activity may then promote autophagosome formation (Figure 6C).

In HEK293 cells, MEFs, neutrophils and macrophages, inhibition of AMPK activity by GSK3 $\beta$  has been associated with phosphorylation of AMPK at both Thr<sup>479</sup> and Ser<sup>485</sup> [21,22].

If the converse mechanism were involved in the activation of AMPK activity by GSK3 $\beta$  inhibition, we might expect to find a decreased ratio of p-AMPK<sup>Ser485</sup>/t-AMPK $\alpha$ 1. However, under both control and excess nutrient conditions, we did not observe any changes in this phosphorylation site (Supplementary Figure S7) upon knockdown of GSK3 $\beta$ .

### CHIR 99021 alters autophagy and AMPK/Akt markers *in vivo*

To validate our studies in HAECs, and explore the efficacy of regulating autophagy via GSK3 $\beta$  inhibition *in vivo*, we treated mice with 7.5 mg/kg per day CHIR 99021 for 3 days to inhibit GSK3 $\beta$  activity in the aorta (Supplementary Figure S8). Similar to our findings in shGSK3 $\beta$ -infected HAECs (Figures 4A, Supplementary Figure S5A), inhibition of GSK3 $\beta$  with CHIR

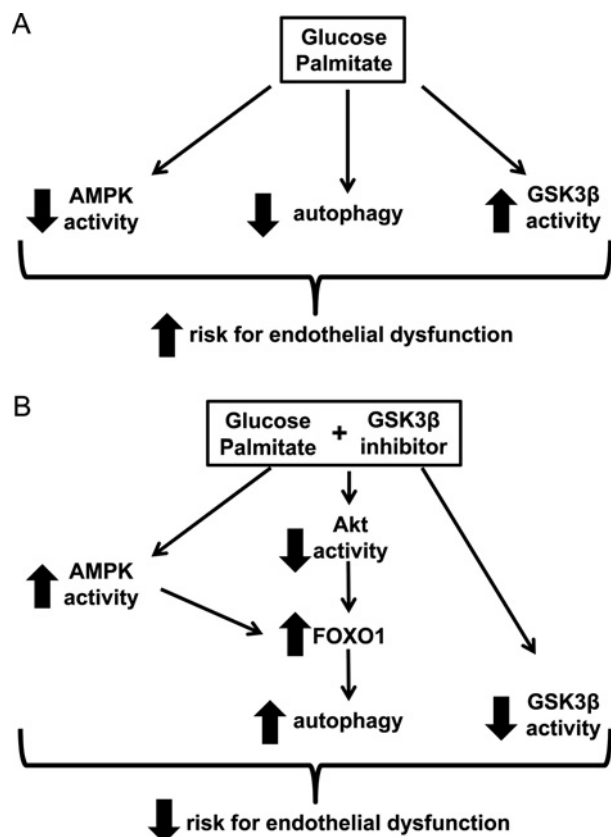

**Figure 8 Potential use of GSK3 $\beta$  inhibitors to reduce excess nutrient-induced endothelial dysfunction**

(A) In the presence of high concentrations of glucose and palmitate, AMPK activity and basal autophagy decrease whereas GSK3 $\beta$  activity increases. These changes predispose endothelial cells to atherogenesis by increasing risk for endothelial dysfunction. (B) Inhibition of GSK3 $\beta$  in the presence of excess nutrients increases AMPK activity and autophagy, thereby reducing risk for endothelial dysfunction.

99021 increased protein levels of LC3-II in the mouse aorta (Figure 7A). CHIR 99021 also increased AMPK activity (as indicated by an increase in protein levels of p-ACC<sup>Ser79</sup>) (Figure 7B). We also observed decreased ratios of p-Akt<sup>Ser473</sup>/t-Akt and p-Akt<sup>Thr308</sup>/t-Akt in the aortas of CHIR 99021-treated mice (Figure 7C), suggesting that *in vivo*, GSK3 $\beta$  inhibition may affect similar signalling pathways as elucidated in human primary cell culture [30,57–67].

## DISCUSSION

We previously showed that high concentrations of glucose and palmitate decrease AMPK activity and basal autophagy in HAECs [1]. In this work, we pursued the mechanism by which this occurs and found that it involves GSK3 $\beta$  (Figure 8A). Consistent with reports in other types of cells, we observed that GSK3 $\beta$  activity was inversely related to lysosome acidification

in HAECs. Beyond this observation, our studies include the novel findings that (1) excess nutrients increase GSK3 $\beta$  activity, (2) increased GSK3 $\beta$  activity likely contributes to excess nutrient-induced decreases in lysosome acidification, (3) GSK3 $\beta$  activity is inversely related to autophagosome formation and unlike AMPK activation, GSK3 $\beta$  inhibition is an effective strategy to increase the number of autophagosomes under both control and excess nutrient conditions, (4) inhibition of GSK3 $\beta$  may induce autophagosome formation by activating FOXO1, potentially through increasing AMPK activity and/or decreasing Akt activity and (5) treatment of mice with the GSK3 $\beta$  inhibitor CHIR 99021 increases LC3-II protein levels and AMPK activity and decreases Akt activity in the mouse aorta, suggesting that targeting GSK3 $\beta$  may be a viable strategy to induce autophagy *in vivo*. Low levels of AMPK activity and autophagy in the presence of excess nutrients are associated with atherogenesis. Therefore, amplification of both of these processes by suppressing GSK3 $\beta$  may potentially reduce endothelial dysfunction (Figure 8B).

Impaired lysosome acidification has been inversely related to GSK3 $\beta$  activity in a number of different cell types, although the mechanism underlying this relationship seems to vary. In SHSY-5Y cells, GSK3 $\beta$  inhibitor-induced increases in lysosomal acidification were attributed to glycosylation of the lysosomal v-ATPase [23], whereas in HEK293 cells, they were associated with increased nuclear translocation of TFEB [25], a transcription factor for autophagy-related genes. In our HAEC model, GSK3 $\beta$  may be modifying the v-ATPase, but we doubt that TFEB is involved since GSK3 $\beta$  inhibition did not affect lysosome abundance (Figure 2B).

In addition to GSK3 $\beta$ , changes in AMPK activity in our HAEC model of type 2 diabetes could contribute to alterations in lysosome acidification. In rat microglia, activation of AMPK by metformin decreased lysosomal pH [26] suggesting that active AMPK may stabilize the lysosome. Since inhibition of GSK3 $\beta$  in HAECs not only attenuated the effect of excess nutrients on lysosome acidification (Figure 2A), but increased AMPK activity in excess nutrient-exposed cells (Figure 6B), AMPK may be mediating the effects of GSK3 $\beta$  on the lysosome. Alternatively, GSK3 $\beta$ -induced damage to the lysosome may contribute to the decreased AMPK activity that we previously observed in our excess nutrient-exposed HAECs [1]. AMPK can be activated at the lysosome [40,68], and inhibition of lysosome acidification has been shown to suppress AMPK activity in several cancer cell lines [69]. These speculations require further inquiry, as it is unknown how AMPK and the lysosome interact under excess nutrient conditions and whether this interaction involves GSK3 $\beta$ .

The majority of studies that relate GSK3 $\beta$  with autophagy do so through its effects on the lysosome. We found that in addition to the lysosome, GSK3 $\beta$  activity can also modulate autophagosome formation, perhaps through Akt/AMPK-FOXO1 signalling. Future work will not only clarify the key molecules involved in this signalling cascade, but also whether FOXO1 increases autophagy in our shGSK3 $\beta$ -infected HAECs via increased gene expression of *PIK3C3* and *Sod2* or through increased association with Atg7. It is also possible that FOXO1-independent factors could be involved. For example, suppression of Akt phosphoryla-

tion in shGSK3 $\beta$ -infected cells could promote autophagosome formation by reducing phosphorylation of beclin-1 [70].

Our observation of decreased Akt activity in shGSK3 $\beta$ -infected cells is distinct from Akt's established role as a kinase upstream of GSK3 $\beta$ . We suspect that this inhibition of Akt activity may be due to changes in phosphoinositide-3 kinase (PI3K) localization. It has been shown in *dictyostelium* that GSK3 phosphorylates PI3K1 and that this phosphorylation is required for its cAMP-induced membrane localization [71]. Membrane-localized PI3K1 is crucial for its downstream signalling, as genetic ablation of GSK3 in *dictyostelium* decreases protein kinase B (Akt) phosphorylation [72]. Although these relationships need to be verified in our model, these data suggest that inhibition of GSK3 $\beta$  may prevent PI3K from migrating to the membrane and thus suppress Akt activity. We speculate that this negative feedback loop may exist to prevent excessive suppression of GSK3 $\beta$  activity.

The primary objective of these studies was to understand the downstream consequences of GSK3 $\beta$  inhibition, in order to determine if it would be a suitable target for modulation of autophagy in cells exposed to excess nutrients. However, future work will elucidate how GSK3 $\beta$  is initially affected by high concentrations of glucose and palmitate. There are several possible molecules which might activate GSK3 $\beta$  in the presence of excess nutrients, including Akt [30], protein phosphatase 2A (PP2A) [57–60] and Wnt [61]. Since we did not observe any change in the ratio of p-Akt1<sup>Ser473</sup>/t-Akt between control and excess nutrient conditions (Supplementary Figure S9), we will focus our studies on PP2A, a molecule whose activation has been observed in animal models of insulin resistance [62,63] and in cell-culture studies using high concentrations of glucose and palmitate [64–66]. Our previous work in HUVECs indicated that the same concentrations of glucose and palmitate used in the current study increased cellular concentrations of ceramide, an activator of PP2A. Furthermore, we found that preventing nutrient-induced ceramide accumulation, through the overexpression of the lysosomal enzyme acid ceramidase, attenuated nutrient-induced losses in phosphorylation of uncoordinated 51-like kinase 1 [1], a kinase involved in autophagosome formation. In addition to activating GSK3 $\beta$ , PP2A is also associated with reduced AMPK activity [64]. Thus, nutrient-induced PP2A activation that increases GSK3 $\beta$  activity in our model would be consistent with two inverse associations that we observed in the present study: (1) between GSK3 $\beta$  and autophagosome formation (Figure 4) and (2) between GSK3 $\beta$  and AMPK signalling (Figure 6).

Preliminary findings from our laboratory indicate that treatment of HAECs with the PP2A inhibitor okadaic acid [60,67] inhibited GSK3 $\beta$  activity and increased AMPK activity under control conditions (Supplementary Figure S10A). Similar changes were observed under excess nutrient conditions (Supplementary Figure S10B), although the effect of okadaic acid was not as robust. This may be due to a higher amount of residual PP2A activity under excess nutrient conditions following okadaic acid treatment. Nevertheless, these data suggest that in the presence of excess nutrients, inhibition of PP2A can reduce GSK3 $\beta$  activity. We also found that in the presence of excess nutrients, oka-

daic acid increased both the level of bafilomycin-induced LC3-II protein as well as the LC3-II/LC3-I ratio (Supplementary Figure S11A), but did not alter lysotracker staining (Supplementary Figure S11B). Together, these data suggest that in addition to activating GSK3 $\beta$ , excess nutrient-induced changes in PP2A may alter autophagosome formation, but are not alone sufficient to affect lysosome acidification. Thus, exposure of HAECs to excess nutrients may activate several factors, including PP2A, which activate GSK3 $\beta$  and subsequently affect different elements of the autophagy process (Supplementary Figure S11C).

PP2A has been shown to activate GSK3 $\beta$  activity in cancer cells as well as neurons [57–60,73]. Interestingly in HEK293 cells, not only does inhibition of PP2A inhibit GSK3 $\beta$ , but overexpression of GSK3 $\beta$  increases PP2A activity [64,73,74–76]. An inverse relationship between PP2A and autophagy has been found in MCF-7 cells [77], cortical neurons [78], rat neurons [79] and rat hepatocytes [80]. However, other studies (using similar doses of okadaic acid) in cortical neurons [81] and rat hepatocytes [82,83] have suggested that PP2A inhibition inhibits autophagy. This lack of consensus in the literature may be due to heterogeneity in treatment conditions among these studies. Since there are likely to be a large number of PP2A substrates, differences in nutrient status and okadaic acid treatment duration may affect several PP2A substrates that differentially affect autophagy. Clearly, much remains to be discovered regarding the actions of PP2A, including whether GSK3 $\beta$  is activating PP2A in excess nutrient-exposed HAECs and whether induction of autophagy by PP2A inhibition requires modulation of GSK3 $\beta$  activity.

GSK3 $\beta$  inhibitors have been associated with therapeutic benefits for a number of conditions associated with hyperglycaemia and dyslipidaemia [20,84–89]. Experimental human and animal models have shown that GSK3 $\beta$  inhibitors decrease blood glucose levels and improve insulin sensitivity [89–92], perhaps by reducing phosphorylation of IRS-1 (to increase IRS-1 stability and improve insulin action) [89,93,94] and/or reducing phosphorylation of GS (to increase GS activity and the conversion of glucose to glycogen) [90,91]. Increased glucose transport upon GSK3 $\beta$  inhibition has also been associated with increased GLUT4 expression in muscle, increased phosphorylated AMPK in the liver and decreased GLUT2 expression in the liver [89]. In addition to these actions on metabolism, GSK3 $\beta$  inhibitors have been associated with reduction of diabetic complications in the heart [20,84], vasculature [86–88] and pancreas [89]. These complications have been associated with lipid accumulation, inflammation, fibrosis, oxidative damage and endoplasmic reticulum stress, all of which are reduced by GSK3 $\beta$  inhibition possibly through mediators such as sterol regulatory binding protein (SREBP), caspase 3 and NF- $\kappa$ B [20,86,89]. Studies in rat cerebral microvascular endothelial cells suggest that suppression of Wnt signalling may also link GSK3 $\beta$  hyperactivation with diabetic vascular damage. Chong and colleagues found that subjecting these cells to hyperglycaemic conditions increased GSK3 $\beta$  activity as well as apoptosis [95,96]. Treatment with erythropoietin improved cell survival in hyperglycaemia by stabilizing Wnt and activating Akt, thereby inhibiting GSK3 $\beta$  and stabilizing  $\beta$ -catenin [96]. Our work expands upon this body of literature, showing that GSK3 $\beta$

inhibition may attenuate diabetes-induced autophagy impairment in HAECs by increasing autophagosome formation, potentially by Akt/AMPK-FOXO1 signalling. Our analysis of autophagy and its related signalling in the mouse aorta lays the foundation for future investigations of GSK3 $\beta$  and autophagy in the aorta and more specifically, aortic endothelial cells, in mouse models of diabetes. These studies will help not only clarify the role of autophagy in diabetic vascular disease, but also elucidate the relative contribution of autophagy to the effects of GSK3 $\beta$  inhibitors.

Despite this growing body of preclinical data supporting a role for GSK3 $\beta$  in diabetes, most clinical trials using GSK3 $\beta$  inhibitors study neurological diseases such as Alzheimer's Disease and Progressive Supranuclear Palsy [97,98]. One potential way to improve the efficacy of GSK3 $\beta$  inhibitors in metabolic disease (and potentially prompt future clinical trials) could be to include them in combination therapies. For example, combining a therapy that inhibits GSK3 $\beta$  (to increase autophagy) with one that activates AMPK (to reduce inflammation and oxidative stress) may improve the prognosis for diabetic cardiovascular complications [68].

Collectively, we have shown that the conditions which mimic those of type 2 diabetes increased GSK3 $\beta$  activity in HAECs. Suppression of GSK3 $\beta$  in this nutrient-laden environment not only increased AMPK signalling but also increased certain features of basal autophagy. These effects on basal autophagy may be dependent on FOXO1, in concert with Akt and/or AMPK signalling. By unravelling more of the mechanistic details by which high concentrations of glucose and palmitate impair basal autophagy, this work brings us one step closer to the development of therapies that maintain vascular endothelial cell health amidst diabetic stresses.

#### AUTHOR CONTRIBUTION

Experiments were designed and performed by Karen Weikel, José Cacicedo and Yasuo Ido. Data were interpreted by Karen Weikel, José Cacicedo and Yasuo Ido. Manuscript was prepared by Karen Weikel, Yasuo Ido and Neil Ruderman.

#### FUNDING

This work was supported by the American Diabetes Association [grant number 7-11-MN-43 (to N.B.R.)]; National Institute of Health National Institute of Diabetes and Digestive and Kidney Diseases Institute [grant numbers NIH R01 DK067509-06 (to N.B.R.) and NIH R01 DK019514-34 (to N.B.R.)]; and the NIH T32 Multidisciplinary Training in Cardiovascular Research [grant number HL007224 (to K.A.W.)].

## REFERENCES

- Weikel, K.A., Cacicedo, J.M., Ruderman, N.B. and Ido, Y. (2015) Glucose and palmitate uncouple AMPK from autophagy in human aortic endothelial cells. *Am. J. Physiol. Cell Physiol.* **308**, C249–C263 [CrossRef](#)
- Wang, Q., Zhang, M., Liang, B., Shirwany, N., Zhu, Y. and Zou, M.H. (2011) Activation of AMP-activated protein kinase is required for berberine-induced reduction of atherosclerosis in mice: the role of uncoupling protein 2. *PLoS One* **6**, e25436 [CrossRef](#) [PubMed](#)
- Dong, Y., Zhang, M., Wang, S., Liang, B., Zhao, Z., Liu, C., Wu, M., Choi, H.C., Lyons, T.J. and Zou, M.H. (2010) Activation of AMP-activated protein kinase inhibits oxidized LDL-triggered endoplasmic reticulum stress *in vivo*. *Diabetes* **59**, 1386–1396 [CrossRef](#) [PubMed](#)
- Zhang, H., Dellsperger, K.C. and Zhang, C. (2012) The link between metabolic abnormalities and endothelial dysfunction in type 2 diabetes: an update. *Basic Res. Cardiol.* **107**, 237 [CrossRef](#) [PubMed](#)
- Rask-Madsen, C. and King, G.L. (2013) Vascular complications of diabetes: mechanisms of injury and protective factors. *Cell Metab.* **17**, 20–33 [CrossRef](#) [PubMed](#)
- Mizushima, N. (2011) Autophagy in protein and organelle turnover. *Cold Spring. Harb. Symp. Quant. Biol.* **76**, 397–402 [CrossRef](#) [PubMed](#)
- Razani, B., Feng, C., Coleman, T., Emanuel, R., Wen, H., Hwang, S., Ting, J.P., Virgin, H.W., Kastan, M.B. and Semenkovich, C.F. (2012) Autophagy links inflammasomes to atherosclerotic progression. *Cell Metab.* **15**, 534–544 [CrossRef](#) [PubMed](#)
- Emanuel, R., Sergin, I., Bhattacharya, S., Turner, J.N., Epelman, S., Settembre, C., Diwan, A., Ballabio, A. and Razani, B. (2014) Induction of lysosomal biogenesis in atherosclerotic macrophages can rescue lipid-induced lysosomal dysfunction and downstream sequelae. *Arterioscler. Thromb. Vasc. Biol.* **34**, 1942–1952 [CrossRef](#) [PubMed](#)
- Liao, X., Sluimer, J.C., Wang, Y., Subramanian, M., Brown, K., Pattison, J.S., Robbins, J., Martinez, J. and Tabas, I. (2012) Macrophage autophagy plays a protective role in advanced atherosclerosis. *Cell Metab.* **15**, 545–553 [CrossRef](#) [PubMed](#)
- Chen, W.Q., Zhong, L., Zhang, L., Ji, X.P., Zhang, M., Zhao, Y.X., Zhang, C. and Zhang, Y. (2009) Oral rapamycin attenuates inflammation and enhances stability of atherosclerotic plaques in rabbits independent of serum lipid levels. *Br. J. Pharmacol.* **156**, 941–951 [CrossRef](#) [PubMed](#)
- Verheye, S., Martinet, W., Kockx, M.M., Knaapen, M.W., Salu, K., Timmermans, J.P., Ellis, J.T., Kilpatrick, D.L. and De Meyer, G.R. (2007) Selective clearance of macrophages in atherosclerotic plaques by autophagy. *J. Am. Coll. Cardiol.* **49**, 706–715 [CrossRef](#) [PubMed](#)
- Zhai, C., Cheng, J., Mujahid, H., Wang, H., Kong, J., Yin, Y., Li, J., Zhang, Y., Ji, X. and Chen, W. (2014) Selective inhibition of PI3K/Akt/mTOR signaling pathway regulates autophagy of macrophage and vulnerability of atherosclerotic plaque. *PLoS One* **9**, e90563 [CrossRef](#) [PubMed](#)
- Zhang, Y.L., Cao, Y.J., Zhang, X., Liu, H.H., Tong, T., Xiao, G.D., Yang, Y.P. and Liu, C.F. (2010) The autophagy-lysosome pathway: a novel mechanism involved in the processing of oxidized LDL in human vascular endothelial cells. *Biochem. Biophys. Res. Commun.* **394**, 377–382 [CrossRef](#) [PubMed](#)
- Cacicedo, J.M., Benjachareonwong, S., Chou, E., Yagihashi, N., Ruderman, N.B. and Ido, Y. (2011) Activation of AMP-activated protein kinase prevents lipotoxicity in retinal pericytes. *Invest. Ophthalmol. Vis. Sci.* **52**, 3630–3639 [CrossRef](#) [PubMed](#)
- Egan, D.F., Shackelford, D.B., Mihaylova, M.M., Gelino, S., Kohnz, R.A., Mair, W., Vasquez, D.S., Joshi, A., Gwinn, D.M., Taylor, R. et al. (2011) Phosphorylation of ULK1 (hATG1) by AMP-activated protein kinase connects energy sensing to mitophagy. *Science* **331**, 456–461 [CrossRef](#) [PubMed](#)
- Gwinn, D.M., Shackelford, D.B., Egan, D.F., Mihaylova, M.M., Mery, A., Vasquez, D.S., Turk, B.E. and Shaw, R.J. (2008) AMPK phosphorylation of raptor mediates a metabolic checkpoint. *Mol. Cell* **30**, 214–226 [CrossRef](#) [PubMed](#)
- Inoki, K., Zhu, T. and Guan, K.L. (2003) TSC2 mediates cellular energy response to control cell growth and survival. *Cell* **115**, 577–590 [CrossRef](#) [PubMed](#)

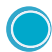

- 18 Nikoulina, S.E., Ciaraldi, T.P., Mudaliar, S., Mohideen, P., Carter, L. and Henry, R.R. (2000) Potential role of glycogen synthase kinase-3 in skeletal muscle insulin resistance of type 2 diabetes. *Diabetes* **49**, 263–271 [CrossRef PubMed](#)
- 19 Eldar-Finkelman, H., Schreyer, S.A., Shinohara, M.M., LeBoeuf, R.C. and Krebs, E.G. (1999) Increased glycogen synthase kinase-3 activity in diabetes- and obesity-prone C57BL/6J mice. *Diabetes* **48**, 1662–1666 [CrossRef PubMed](#)
- 20 Wang, Y., Feng, W., Xue, W., Tan, Y., Hein, D.W., Li, X.K. and Cai, L. (2009) Inactivation of GSK-3beta by metallothionein prevents diabetes-related changes in cardiac energy metabolism, inflammation, nitrosative damage, and remodeling. *Diabetes* **58**, 1391–1402 [CrossRef PubMed](#)
- 21 Suzuki, T., Bridges, D., Nakada, D., Skiniotis, G., Morrison, S.J., Lin, J.D., Saltiel, A.R. and Inoki, K. (2013) Inhibition of AMPK catabolic action by GSK3. *Mol. Cell* **50**, 407–419 [CrossRef PubMed](#)
- 22 Park, D.W., Jiang, S., Liu, Y., Siegal, G.P., Inoki, K., Abraham, E. and Zmijewski, J.W. (2014) GSK3beta-dependent inhibition of AMPK potentiates activation of neutrophils and macrophages and enhances severity of acute lung injury. *Am. J. Physiol. Lung Cell. Mol. Physiol.* **307**, L735–L745 [CrossRef PubMed](#)
- 23 Avrahami, L., Farfara, D., Shaham-Kol, M., Vassar, R., Frenkel, D. and Eldar-Finkelman, H. (2013) Inhibition of glycogen synthase kinase-3 ameliorates beta-amyloid pathology and restores lysosomal acidification and mammalian target of rapamycin activity in the Alzheimer disease mouse model: *in vivo* and *in vitro* studies. *J. Biol. Chem.* **288**, 1295–1306 [CrossRef PubMed](#)
- 24 Azoulay-Alfaguter, I., Elya, R., Avrahami, L., Katz, A. and Eldar-Finkelman, H. (2015) Combined regulation of mTORC1 and lysosomal acidification by GSK-3 suppresses autophagy and contributes to cancer cell growth. *Oncogene* **34**, 4613–4623 [CrossRef PubMed](#)
- 25 Marchand, B., Arsenault, D., Raymond-Fleury, A., Boisvert, F.M. and Boucher, M.J. (2015) Glycogen synthase kinase-3 (GSK3) inhibition induces pro-survival autophagic signals in human pancreatic cancer cells. *J. Biol. Chem.* **290**, 5592–5605 [CrossRef PubMed](#)
- 26 Labuzek, K., Liber, S., Gabryel, B., Adamczyk, J. and Okopien, B. (2010) Metformin increases phagocytosis and acidifies lysosomal/endosomal compartments in AMPK-dependent manner in rat primary microglia. *Naunyn-Schmiedeberg's Arch. Pharmacol.* **381**, 171–186 [CrossRef PubMed](#)
- 27 Cacicedo, J.M., Yagihashi, N., Keaney, Jr, J.F., Ruderman, N.B. and Ido, Y. (2004) AMPK inhibits fatty acid-induced increases in NF-kappaB transactivation in cultured human umbilical vein endothelial cells. *Biochem. Biophys. Res. Commun.* **324**, 1204–1209 [CrossRef PubMed](#)
- 28 Ido, Y., Duranton, A., Lan, F., Cacicedo, J.M., Chen, T.C., Breton, L. and Ruderman, N.B. (2012) Acute activation of AMP-activated protein kinase prevents H<sub>2</sub>O<sub>2</sub>-induced premature senescence in primary human keratinocytes. *PLoS One* **7**, e35092 [CrossRef PubMed](#)
- 29 Qi, X.J., Wildey, G.M. and Howe, P.H. (2006) Evidence that Ser87 of BimEL is phosphorylated by Akt and regulates BimEL apoptotic function. *J. Biol. Chem.* **281**, 813–823 [CrossRef PubMed](#)
- 30 Cross, D.A., Alessi, D.R., Cohen, P., Andjelkovich, M. and Hemmings, B.A. (1995) Inhibition of glycogen synthase kinase-3 by insulin mediated by protein kinase B. *Nature* **378**, 785–789 [CrossRef PubMed](#)
- 31 Koga, H., Kaushik, S. and Cuervo, A.M. (2010) Altered lipid content inhibits autophagic vesicular fusion. *FASEB J.* **24**, 3052–3065 [CrossRef PubMed](#)
- 32 De Duve, C. and Wattiaux, R. (1966) Functions of lysosomes. *Annu. Rev. Physiol.* **28**, 435–492 [CrossRef PubMed](#)
- 33 Wunderlich, W., Fialka, I., Teis, D., Alpi, A., Pfeifer, A., Parton, R.G., Lottspeich, F. and Huber, L.A. (2001) A novel 14-kilodalton protein interacts with the mitogen-activated protein kinase scaffold mp1 on a late endosomal/lysosomal compartment. *J. Cell Biol.* **152**, 765–776 [CrossRef PubMed](#)
- 34 An, W.F., Germain, A.R., Bishop, J.A., Nag, P.P., Metkar, S., Ketterman, J., Walk, M., Weiwer, M., Liu, X., Patnaik, D. et al. (2010) Discovery of Potent and Highly Selective Inhibitors of GSK3b. Probe Reports from the NIH Molecular Libraries Program, National Center for Biotechnology Information (US), Bethesda, MD
- 35 Pena-Llopis, S., Vega-Rubin-de-Celis, S., Schwartz, J.C., Wolff, N.C., Tran, T.A., Zou, L., Xie, X.J., Corey, D.R. and Brugarolas, J. (2011) Regulation of TFEB and V-ATPases by mTORC1. *EMBO J.* **30**, 3242–3258 [CrossRef PubMed](#)
- 36 Wirth, M., Joachim, J. and Tooze, S.A. (2013) Autophagosome formation – the role of ULK1 and Beclin1-P13KC3 complexes in setting the stage. *Semin. Cancer Biol.* **23**, 301–309 [CrossRef PubMed](#)
- 37 Klionsky, D.J., Abdalla, F.C., Abeliovich, H., Abraham, R.T., Acevedo-Arozena, A., Adeli, K., Agholme, L., Agnello, M., Agostinis, P., Aguirre-Giso, J.A. et al. (2012) Guidelines for the use and interpretation of assays for monitoring autophagy. *Autophagy* **8**, 445–544 [CrossRef PubMed](#)
- 38 Kuma, A., Matsui, M. and Mizushima, N. (2007) LC3, an autophagosome marker, can be incorporated into protein aggregates independent of autophagy: caution in the interpretation of LC3 localization. *Autophagy* **3**, 323–328 [CrossRef PubMed](#)
- 39 Hosokawa, N., Hara, T., Kaizuka, T., Kishi, C., Takamura, A., Miura, Y., Iemura, S., Natsume, T., Takehana, K., Yamada, N. et al. (2009) Nutrient-dependent mTORC1 association with the ULK1-Atg13-FIP200 complex required for autophagy. *Mol. Biol. Cell* **20**, 1981–1991 [CrossRef PubMed](#)
- 40 Zhang, C.S., Jiang, B., Li, M., Zhu, M., Peng, Y., Zhang, Y.L., Wu, Y.Q., Li, T.Y., Liang, Y. and Lu, Z. (2014) The lysosomal v-ATPase-Ragulator complex is a common activator for AMPK and mTORC1, acting as a switch between catabolism and anabolism. *Cell Metab.* **20**, 526–540 [CrossRef PubMed](#)
- 41 Huang, J., Zhang, Y., Bersenev, A., O'Brien, W.T., Tong, W., Emerson, S.G. and Klein, P.S. (2009) Pivotal role for glycogen synthase kinase-3 in hematopoietic stem cell homeostasis in mice. *J. Clin. Invest.* **119**, 3519–3529 [PubMed](#)
- 42 Inoki, K., Ouyang, H., Zhu, T., Lindvall, C., Wang, Y., Zhang, X., Yang, Q., Bennett, C., Harada, Y., Stankunas, K. et al. (2006) TSC2 integrates Wnt and energy signals via a coordinated phosphorylation by AMPK and GSK3 to regulate cell growth. *Cell* **126**, 955–968 [CrossRef PubMed](#)
- 43 Xu, P., Das, M., Reilly, J. and Davis, R.J. (2011) JNK regulates FoxO-dependent autophagy in neurons. *Genes Dev.* **25**, 310–322 [CrossRef PubMed](#)
- 44 Zhao, Y., Yang, J., Liao, W., Liu, X., Zhang, H., Wang, S., Wang, D., Feng, J., Yu, L. and Zhu, W.G. (2010) Cytosolic FoxO1 is essential for the induction of autophagy and tumour suppressor activity. *Nat. Cell Biol.* **12**, 665–675 [CrossRef PubMed](#)
- 45 Calnan, D.R. and Brunet, A. (2008) The FoxO code. *Oncogene* **27**, 2276–2288 [CrossRef PubMed](#)
- 46 Ferdous, A., Battiprolu, P.K., Ni, Y.G., Rothermel, B.A. and Hill, J.A. (2010) FoxO, autophagy, and cardiac remodeling. *J. Cardiovasc. Transl. Res.* **3**, 355–364 [CrossRef PubMed](#)
- 47 Dharaneeswaran, H., Abid, M.R., Yuan, L., Dupuis, D., Beeler, D., Spokes, K.C., Janes, L., Sciuto, T., Kang, P.M., Jaminet, S.C. et al. (2014) FOXO1-mediated activation of Akt plays a critical role in vascular homeostasis. *Circ. Res.* **115**, 238–251 [CrossRef PubMed](#)
- 48 Kim, J., Kim, Y.C., Fang, C., Russell, R.C., Kim, J.H., Fan, W., Liu, R., Zhong, Q. and Guan, K.L. (2013) Differential regulation of distinct Vps34 complexes by AMPK in nutrient stress and autophagy. *Cell* **152**, 290–303 [CrossRef PubMed](#)

- 49 Luo, X., Yang, Z., Zheng, S., Cao, Y. and Wu, Y. (2014) Sirt3 activation attenuated oxidized low-density lipoprotein-induced human umbilical vein endothelial cells' apoptosis by sustaining autophagy. *Cell Biol. Int.*, doi:10.1002/cbin.10291
- 50 Biggs, 3rd, W.H., Meisenhelder, J., Hunter, T., Cavenee, W.K. and Arden, K.C. (1999) Protein kinase B/Akt-mediated phosphorylation promotes nuclear exclusion of the winged helix transcription factor FKHR1. *Proc. Natl. Acad. Sci. U.S.A.* **96**, 7421–7426 [CrossRef PubMed](#)
- 51 Zhao, Y., Wang, Y. and Zhu, W.G. (2011) Applications of post-translational modifications of FoxO family proteins in biological functions. *J. Mol. Cell Biol.* **3**, 276–282 [CrossRef PubMed](#)
- 52 Yun, H., Park, S., Kim, M.J., Yang, W.K., Im, D.U., Yang, K.R., Hong, J., Choe, W., Kang, I., Kim, S.S. and Ha, J. (2014) AMP-activated protein kinase mediates the antioxidant effects of resveratrol through regulation of the transcription factor FoxO1. *FEBS J.* **281**, 4421–4438 [CrossRef PubMed](#)
- 53 Awad, H., Nolette, N., Hinton, M. and Dakshinamurti, S. (2014) AMPK and FoxO1 regulate catalase expression in hypoxic pulmonary arterial smooth muscle. *Pediatr. Pulmonol.* **49**, 885–897 [CrossRef PubMed](#)
- 54 Hardie, D.G. (2015) AMPK: positive and negative regulation, and its role in whole-body energy homeostasis. *Curr. Opin. Cell Biol.* **33**, 1–7 [CrossRef PubMed](#)
- 55 Winder, W.W. and Hardie, D.G. (1999) AMP-activated protein kinase, a metabolic master switch: possible roles in type 2 diabetes. *Am. J. Physiol.* **277** (1 Pt 1), E1–E10 [PubMed](#)
- 56 Sarbassov, D.D., Guertin, D.A., Ali, S.M. and Sabatini, D.M. (2005) Phosphorylation and regulation of Akt/PKB by the rictor-mTOR complex. *Science* **307**, 1098–1101 [CrossRef PubMed](#)
- 57 Gursel, D.B., Banu, M.A., Berry, N., Marongiu, R., Burkhardt, J.K., Kobylarz, K., Kaplitt, M.G., Rafii, S. and Boockvar, J.A. (2015) Tight regulation between cell survival and programmed cell death in GBM stem-like cells by EGFR/GSK3b/PP2A signaling. *J. Neuro-Oncol.* **121**, 19–29 [CrossRef](#)
- 58 Lin, C.F., Chen, C.L., Chiang, C.W., Jan, M.S., Huang, W.C. and Lin, Y.S. (2007) GSK-3 $\beta$  acts downstream of PP2A and the PI 3-kinase-Akt pathway, and upstream of caspase-2 in ceramide-induced mitochondrial apoptosis. *J. Cell Sci.* **120** (Pt 16), 2935–2943 [CrossRef PubMed](#)
- 59 Chen, G., Bower, K.A., Ma, C., Fang, S., Thiele, C.J. and Luo, J. (2004) Glycogen synthase kinase 3 $\beta$  (GSK3 $\beta$ ) mediates 6-hydroxydopamine-induced neuronal death. *FASEB J.* **18**, 1162–1164 [CrossRef PubMed](#)
- 60 Hernandez, F., Langa, E., Cuadros, R., Avila, J. and Villanueva, N. (2010) Regulation of GSK3 isoforms by phosphatases PP1 and PP2A. *Mol. Cell. Biochem.* **344**, 211–215 [CrossRef PubMed](#)
- 61 Metcalfe, C. and Bienz, M. (2011) Inhibition of GSK3 by Wnt signalling – two contrasting models. *J. Cell Sci.* **124** (Pt 21), 3537–3544 [CrossRef PubMed](#)
- 62 Coughlan, K.A., Balon, T.W., Valentine, R.J., Petrocelli, R., Schultz, V., Brandon, A., Cooney, G.J., Kraegen, E.W., Ruderman, N.B. and Saha, A.K. (2015) Nutrient excess and AMPK downregulation in incubated skeletal muscle and muscle of glucose infused rats. *PLoS One* **10**, e0127388 [CrossRef PubMed](#)
- 63 Zhang, Q.J., Holland, W.L., Wilson, L., Tanner, J.M., Kearns, D., Cahoon, J.M., Pettey, D., Losee, J., Duncan, B., Gale, D. et al. (2013) Ceramide mediates vascular dysfunction in diet-induced obesity by PP2A-mediated dephosphorylation of the eNOS-Akt complex. *Diabetes* **61**, 1848–1859 [CrossRef](#)
- 64 Wu, Y., Song, P., Xu, J., Zhang, M. and Zou, M.H. (2007) Activation of protein phosphatase 2A by palmitate inhibits AMP-activated protein kinase. *J. Biol. Chem.* **282**, 9777–9788 [CrossRef PubMed](#)
- 65 Du, Y., Kowluru, A. and Kern, T.S. (2010) PP2A contributes to endothelial death in high glucose: inhibition by benfotiamine. *Am. J. Physiol. Regul. Integr. Comp. Physiol.* **299**, R1610–R1617 [CrossRef PubMed](#)
- 66 Arora, D.K., Machhadieh, B., Matti, A., Wadzinski, B.E., Ramanadham, S. and Kowluru, A. (2014) High glucose exposure promotes activation of protein phosphatase 2A in rodent islets and INS-1 832/13 beta-cells by increasing the posttranslational carboxymethylation of its catalytic subunit. *Endocrinology* **155**, 380–391 [CrossRef PubMed](#)
- 67 Dounay, A.B. and Forsyth, C.J. (2002) Okadaic acid: the archetypal serine/threonine protein phosphatase inhibitor. *Curr. Med. Chem.* **9**, 1939–1980 [CrossRef PubMed](#)
- 68 Weikel, K.A., Ruderman, N.B. and Cacicedo, J.M. (2016) Unraveling the actions of AMP-activated protein kinase in metabolic diseases: Systemic to molecular insights. *Metabolism* **65**, 634–645 [CrossRef PubMed](#)
- 69 Harhaji-Trajkovic, L., Arsin, K., Kravic-Stevovic, T., Petricevic, S., Tovilovic, G., Pantovic, A., Zogovic, N., Ristic, B., Janjetovic, K., Bumbasirevic, V. and Trajkovic, V. (2012) Chloroquine-mediated lysosomal dysfunction enhances the anticancer effect of nutrient deprivation. *Pharm. Res.* **29**, 2249–2263 [CrossRef PubMed](#)
- 70 Wang, R.C., Wei, Y., An, Z., Zou, Z., Xiao, G., Bhagat, G., White, M., Reichelt, J. and Levine, B. (2012) Akt-mediated regulation of autophagy and tumorigenesis through Beclin 1 phosphorylation. *Science* **338**, 956–959 [CrossRef PubMed](#)
- 71 Sun, T., Kim, B. and Kim, L.W. (2013) Glycogen synthase kinase 3 influences cell motility and chemotaxis by regulating PI3K membrane localization in Dictyostelium. *Dev. Growth Differ.* **55**, 723–734 [PubMed](#)
- 72 Teo, R., Lewis, K.J., Forde, J.E., Ryves, W.J., Reddy, J.V., Rogers, B.J. and Harwood, A.J. (2010) Glycogen synthase kinase-3 is required for efficient Dictyostelium chemotaxis. *Mol. Biol. Cell* **21**, 2788–2796 [CrossRef PubMed](#)
- 73 Wang, Y., Yang, R., Gu, J., Yin, X., Jin, N., Xie, S., Wang, Y., Chang, H., Qian, W., Shi, J. et al. (2015) Cross talk between PI3K-AKT-GSK-3 $\beta$  and PP2A pathways determines tau hyperphosphorylation. *Neurobiol. Aging* **36**, 188–200 [CrossRef PubMed](#)
- 74 Millward, T.A., Zolnierowicz, S. and Hemmings, B.A. (1999) Regulation of protein kinase cascades by protein phosphatase 2A. *Trends Biochem. Sci.* **24**, 186–191 [CrossRef PubMed](#)
- 75 Sutherland, C. and Cohen, P. (1994) The alpha-isoform of glycogen synthase kinase-3 from rabbit skeletal muscle is inactivated by p70 S6 kinase or MAP kinase-activated protein kinase-1 *in vitro*. *FEBS Lett.* **338**, 37–42 [CrossRef PubMed](#)
- 76 Park, S., Scheffler, T.L., Rossie, S.S. and Gerrard, D.E. (2013) AMPK activity is regulated by calcium-mediated protein phosphatase 2A activity. *Cell Calcium* **53**, 217–223 [CrossRef PubMed](#)
- 77 Fujiwara, N., Usui, T., Ohama, T. and Sato, K. (2016) Regulation of Beclin 1 phosphorylation and autophagy by PP2A and DAPK3. *J. Biol. Chem.* **291**, 10858–10866 [CrossRef PubMed](#)
- 78 Zhao, J., Wang, D., Li, L., Zhao, W. and Zhang, C. (2014) Protective effects of humanin on okadaic acid-induced neurotoxicities in cultured cortical neurons. *Neurochem. Res.* **39**, 2150–2159 [CrossRef PubMed](#)
- 79 Yoon, S.-Y., Choi, J.E., Kweon, H.S., Choe, H., Kim, S.W., Hwang, O., Lee, H., Lee, J.Y. and Kim, D.H. (2008) Okadaic acid increases autophagosomes in rat neurons: implications for Alzheimer's disease. *J. Neurosci. Res.* **86**, 3230–3239 [CrossRef PubMed](#)
- 80 Samari, H.R., Moller, M.T., Holden, L., Asmyhr, T. and Seglen, P.O. (2005) Stimulation of hepatocytic AMP-activated protein kinase by okadaic acid and other autophagy-suppressive toxins. *Biochem. J.* **386** (Pt 2), 237–244 [CrossRef PubMed](#)

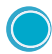

- 81 Magnaudeix, A., Wilson, C.M., Page, G., Bauvy, C., Codogno, P., Leveque, P., Labrousse, F., Corre-Delage, M., Yardin, C. and Terro, F. (2013) PP2A blockade inhibits autophagy and causes intraneuronal accumulation of ubiquitinated proteins. *Neurobiol. Aging* **34**, 770–790 [CrossRef PubMed](#)
- 82 Blankson, H., Holen, I. and Seglen, P.O. (1995) Disruption of the cytokeratin cytoskeleton and inhibition of hepatocytic autophagy by okadaic acid. *Exp. Cell Res.* **218**, 522–530 [CrossRef PubMed](#)
- 83 Gordon, P.B., Holen, I. and Seglen, P.O. (1995) Protection by naringin and some other flavonoids of hepatocytic autophagy and endocytosis against inhibition by okadaic acid. *J. Biol. Chem.* **270**, 5830–5838 [CrossRef PubMed](#)
- 84 Mozaffari, M.S. and Schaffer, S.W. (2008) Effect of pressure overload on cardioprotection of mitochondrial KATP channels and GSK-3beta: interaction with the MPT pore. *Am. J. Hypertens.* **21**, 570–575 [CrossRef PubMed](#)
- 85 Sun, D., Shen, M., Li, J., Li, W., Zhang, Y., Zhao, L., Zhang, Z., Yuan, Y., Wang, H. and Cao, F. (2011) Cardioprotective effects of tanshinone IIA pretreatment via kinin B2 receptor-Akt-GSK-3beta dependent pathway in experimental diabetic cardiomyopathy. *Cardiovasc. Diabetol.* **10**, 4 [CrossRef PubMed](#)
- 86 Robertson, L.A., Kim, A.J. and Werstuck, G.H. (2006) Mechanisms linking diabetes mellitus to the development of atherosclerosis: a role for endoplasmic reticulum stress and glycogen synthase kinase-3. *Can. J. Physiol. Pharmacol.* **84**, 39–48 [CrossRef PubMed](#)
- 87 McAlpine, C.S., Bowes, A.J., Khan, M.I., Shi, Y. and Werstuck, G.H. (2012) Endoplasmic reticulum stress and glycogen synthase kinase-3beta activation in apolipoprotein E-deficient mouse models of accelerated atherosclerosis. *Arterioscler. Thromb. Vasc. Biol.* **32**, 82–91 [CrossRef PubMed](#)
- 88 Bowes, A.J., Khan, M.I., Shi, Y., Robertson, L. and Werstuck, G.H. (2009) Valproate attenuates accelerated atherosclerosis in hyperglycemic apoE-deficient mice: evidence in support of a role for endoplasmic reticulum stress and glycogen synthase kinase-3 in lesion development and hepatic steatosis. *Am. J. Pathol.* **174**, 330–342 [CrossRef PubMed](#)
- 89 Kim, K.M., Lee, K.S., Lee, G.Y., Jin, H., Durrance, E.S., Park, H.S., Choi, S.H., Park, K.S., Kim, Y.B., Jang, H.C. and Lim, S. (2015) Anti-diabetic efficacy of KICG1338, a novel glycogen synthase kinase-3beta inhibitor, and its molecular characterization in animal models of type 2 diabetes and insulin resistance. *Mol. Cell. Endocrinol.* **409**, 1–10 [CrossRef PubMed](#)
- 90 Coghlan, M.P., Culbert, A.A., Cross, D.A., Corcoran, S.L., Yates, J.W., Pearce, N.J., Rausch, O.L., Murphy, G.J., Carter, P.S., Roxbee Cox, L. et al. (2000) Selective small molecule inhibitors of glycogen synthase kinase-3 modulate glycogen metabolism and gene transcription. *Chem. Biol.* **7**, 793–803 [CrossRef PubMed](#)
- 91 Nikoulina, S.E., Ciaraldi, T.P., Mudaliar, S., Carter, L., Johnson, K. and Henry, R.R. (2002) Inhibition of glycogen synthase kinase 3 improves insulin action and glucose metabolism in human skeletal muscle. *Diabetes* **51**, 2190–2198 [CrossRef PubMed](#)
- 92 Ring, D.B., Johnson, K.W., Henriksen, E.J., Nuss, J.M., Goff, D., Kinnick, T.R., Ma, S.T., Reeder, J.W., Samuels, I., Slabiak, T. et al. (2003) Selective glycogen synthase kinase 3 inhibitors potentiate insulin activation of glucose transport and utilization *in vitro* and *in vivo*. *Diabetes* **52**, 588–595 [CrossRef PubMed](#)
- 93 Eldar-Finkelman, H. and Krebs, E.G. (1997) Phosphorylation of insulin receptor substrate 1 by glycogen synthase kinase 3 impairs insulin action. *Proc. Natl. Acad. Sci. U.S.A.* **94**, 9660–9664 [CrossRef PubMed](#)
- 94 Leng, S., Zhang, W., Zheng, Y., Liberman, Z., Rhodes, C.J., Eldar-Finkelman, H. and Sun, X.J. (2010) Glycogen synthase kinase 3 beta mediates high glucose-induced ubiquitination and proteasome degradation of insulin receptor substrate 1. *J. Endocrinol.* **206**, 171–181 [CrossRef PubMed](#)
- 95 Chong, Z.Z., Shang, Y.C. and Maiese, K. (2007) Vascular injury during elevated glucose can be mitigated by erythropoietin and Wnt signaling. *Curr. Neurovasc. Res.* **4**, 194–204 [CrossRef PubMed](#)
- 96 Chong, Z.Z., Hou, J., Shang, Y.C., Wang, S. and Maiese, K. (2011) EPO relies upon novel signaling of Wnt1 that requires Akt1, FoxO3a, GSK-3beta, and beta-catenin to foster vascular integrity during experimental diabetes. *Curr. Neurovasc. Res.* **8**, 103–120 [CrossRef PubMed](#)
- 97 Georgievska, B., Sandin, J., Doherty, J., Mortberg, A., Neelissen, J., Andersson, A., Gruber, S., Nilsson, Y., Schott, P., Arvidsson, P.I. et al. (2013) AZD1080, a novel GSK3 inhibitor, rescues synaptic plasticity deficits in rodent brain and exhibits peripheral target engagement in humans. *J. Neurochem.* **125**, 446–456 [CrossRef PubMed](#)
- 98 Eldar-Finkelman, H. and Martinez, A. (2011) GSK-3 inhibitors: preclinical and clinical focus on CNS. *Front. Mol. Neurosci.* **4**, 32 [CrossRef PubMed](#)

---

Received 25 May 2016/20 July 2016; accepted 14 August 2016

Accepted Manuscript online 16 August 2016, doi 10.1042/BSR20160174

---
